# Supplementary material
Source: PubMed Central journal article supplement (PMC7963598)
Supplement: 17-00173.pdf [file 17-00173.pdf]

**On-line Table 1: Cardioembolism—clinical and imaging characteristics that distinguish cardioembolism (n = 65) from definite arteriopathy (n = 109)<sup>a</sup>**

| Characteristic                                         | Prevalence in Cardioembolic Cases (n = 65) |         | Prevalence in Arteriopathic Cases (n = 109) |        | Univariate Analyses |             |                     | Multivariable Analysis <sup>b</sup> |             |         |
|--------------------------------------------------------|--------------------------------------------|---------|---------------------------------------------|--------|---------------------|-------------|---------------------|-------------------------------------|-------------|---------|
|                                                        | No.                                        | %       | No.                                         | %      | OR                  | 95% CI      | P Value             | OR                                  | 95% CI      | P Value |
| Demographics                                           |                                            |         |                                             |        |                     |             |                     |                                     |             |         |
| Age by category                                        |                                            |         |                                             |        |                     |             |                     |                                     |             |         |
| 0–3 yr                                                 | 29                                         | (44.6)  | 30                                          | (27.5) | Reference           |             |                     |                                     |             |         |
| 4–7 yr                                                 | 8                                          | (12.3)  | 37                                          | (33.9) | 0.22                | (0.09–0.56) | .001                |                                     |             |         |
| 8–11 yr                                                | 7                                          | (10.8)  | 17                                          | (15.6) | 0.43                | (0.15–1.18) | .10                 |                                     |             |         |
| 12–15 yr                                               | 11                                         | (16.9)  | 14                                          | (12.8) | 0.81                | (0.32–2.08) | .67                 |                                     |             |         |
| 16–18 yr                                               | 10                                         | (15.4)  | 11                                          | (10.1) | 0.94                | (0.35–2.55) | .90                 |                                     |             |         |
| Stroke presentation                                    |                                            |         |                                             |        |                     |             |                     |                                     |             |         |
| Any focal signs (vs nonfocal only)                     | 54                                         | (83.1)  | 101                                         | (92.7) | 2.67                | (0.96–7.42) | .059                |                                     |             |         |
| Focal signs                                            |                                            |         |                                             |        |                     |             |                     |                                     |             |         |
| Ataxia                                                 | 4                                          | (6.2)   | 24                                          | (22.0) | 0.23                | (0.08–0.74) | .01                 |                                     |             |         |
| Hemiparesis                                            | 52                                         | (80.0)  | 91                                          | (83.5) | 0.91                | (0.39–2.16) | .84                 |                                     |             |         |
| Dysarthria                                             | 14                                         | (21.5)  | 33                                          | (30.3) | 0.75                | (0.35–1.59) | .45                 |                                     |             |         |
| Aphasia                                                | 12                                         | (18.5)  | 29                                          | (26.6) | 0.62                | (0.27–1.45) | .27                 |                                     |             |         |
| Visual field deficit                                   | 10                                         | (15.4)  | 11                                          | (10.1) | 1.68                | (0.66–4.30) | .28                 |                                     |             |         |
| Nonfocal signs                                         |                                            |         |                                             |        |                     |             |                     |                                     |             |         |
| Headache                                               | 12                                         | (18.5)  | 40                                          | (36.7) | 0.47                | (0.22–1.03) | .06                 |                                     |             |         |
| Nausea/vomiting                                        | 5                                          | (7.7)   | 28                                          | (25.7) | 0.26                | (0.09–0.72) | .009                |                                     |             |         |
| Decreased level of consciousness                       | 20                                         | (30.8)  | 30                                          | (27.5) | 1.37                | (0.68–2.75) | .37                 |                                     |             |         |
| Seizures at presentation                               | 15                                         | (23.1)  | 27                                          | (24.8) | 0.97                | (0.47–2.00) | .93                 |                                     |             |         |
| Vertigo                                                | 4                                          | (6.2)   | 11                                          | (10.1) | 0.60                | (0.18–2.01) | .41                 |                                     |             |         |
| Diplopia                                               | 1                                          | (1.5)   | 1                                           | (0.9)  | 1.87                | (0.11–30.6) | .66                 |                                     |             |         |
| Risk factors or comorbidities (not mutually exclusive) |                                            |         |                                             |        |                     |             |                     |                                     |             |         |
| Cardiac disease                                        | 65                                         | (100.0) | 6                                           | (5.5)  |                     |             | <.0001 <sup>c</sup> | 101.6                               | (17.3–596)  | <.0001  |
| CHD only                                               | 42                                         | (64.6)  | 6                                           | (5.5)  |                     |             |                     |                                     |             |         |
| AHD only                                               | 19                                         | (29.2)  | 0                                           |        |                     |             |                     |                                     |             |         |
| Both CHD and AHD                                       | 4                                          | (6.2)   | 0                                           |        |                     |             |                     |                                     |             |         |
| Other chronic disorders                                |                                            |         |                                             |        |                     |             |                     |                                     |             |         |
| Sickle cell anemia                                     | 0                                          |         | 9                                           | (8.3)  | –                   |             | .03 <sup>c</sup>    |                                     |             |         |
| Indwelling catheter                                    | 5                                          | (7.7)   | 1                                           | (0.9)  | 9.00                | (1.03–78.8) | .05                 |                                     |             |         |
| Acute systemic illness                                 |                                            |         |                                             |        |                     |             |                     |                                     |             |         |
| Meningitis                                             | 0                                          |         | 11                                          | (10.1) | –                   |             | .008 <sup>c</sup>   |                                     |             |         |
| Vascular imaging findings                              |                                            |         |                                             |        |                     |             |                     |                                     |             |         |
| Pathologic finding                                     |                                            |         |                                             |        |                     |             |                     |                                     |             |         |
| Occlusion                                              | 31                                         | (47.7)  | 67                                          | (61.5) | 0.57                | (0.31–1.06) | .08                 |                                     |             |         |
| Stenosis                                               | 7                                          | (10.8)  | 74                                          | (67.9) | 0.06                | (0.02–0.14) | <.0001 <sup>b</sup> | 0.07                                | (0.02–0.28) | <.0001  |
| Irregularity                                           | 6                                          | (9.2)   | 57                                          | (52.3) | 0.09                | (0.04–0.23) | <.0001 <sup>b</sup> | 0.09                                | (0.02–0.34) | <.0001  |
| Banding                                                | 0                                          |         | 7                                           | (6.4)  | –                   |             | .05 <sup>c</sup>    |                                     |             |         |
| Pathologically affected vessels                        |                                            |         |                                             |        |                     |             |                     |                                     |             |         |
| Arterial segments affected                             |                                            |         |                                             |        |                     |             |                     |                                     |             |         |
| >1                                                     | 24                                         | (36.9)  | 94                                          | (86.2) | Reference           |             |                     |                                     |             |         |
| 1                                                      | 41                                         | (63.1)  | 15                                          | (13.8) | 10.7                | (5.10–22.5) | <.0001              |                                     |             |         |
| Vascular territories affected                          |                                            |         |                                             |        |                     |             |                     |                                     |             |         |
| >1                                                     | 7                                          | (10.8)  | 49                                          | (45.0) | Reference           |             |                     |                                     |             |         |
| 1                                                      | 58                                         | (89.2)  | 60                                          | (55.0) | 6.77                | (2.83–16.2) | <.0001 <sup>b</sup> | 6.63                                | (1.40–31.3) | .02     |
| Side affected                                          |                                            |         |                                             |        |                     |             |                     |                                     |             |         |
| Bilateral                                              | 6                                          | (9.2)   | 49                                          | (45.0) | Reference           |             |                     |                                     |             |         |
| Unilateral                                             | 59                                         | (90.8)  | 60                                          | (55.0) | 4.08                | (1.57–10.6) | .004                |                                     |             |         |
| Segment affected                                       |                                            |         |                                             |        |                     |             |                     |                                     |             |         |
| Supraclinoid ICA                                       | 12                                         | (18.5)  | 68                                          | (62.4) | 0.14                | (0.07–0.29) | <.0001              |                                     |             |         |
| Proximal MCA (M1)                                      | 25                                         | (38.5)  | 86                                          | (78.9) | 0.17                | (0.08–0.33) | <.0001              |                                     |             |         |
| Vertebrobasilar artery                                 | 7                                          | (10.8)  | 30                                          | (27.5) | 0.32                | (0.13–0.77) | .01                 |                                     |             |         |
| Cervical arteries                                      | 9                                          | (13.8)  | 27                                          | (24.8) | 0.49                | (0.21–1.12) | .09                 |                                     |             |         |

**Note:**—CHD indicates congenital heart disease; AHD, acquired heart disease; –, cannot be calculated.

<sup>a</sup> Full list of variables tested is shown in On-line Table 5.

<sup>b</sup> Remains significant ( $P < .05$ ) in the multivariable model after stepwise regression ( $P < .05$ ).

<sup>c</sup>  $P$  value was calculated with the Fisher exact test.

**On-line Table 2: Dissection—clinical and imaging characteristics that distinguish arterial dissection (n = 26), compared with all other definite arteriopathy subtypes (n = 83)<sup>a</sup>**

| Characteristic                                         | Prevalence (n = 26) |        | Univariate Analyses |              |                     | Multivariable Analysis <sup>b</sup> |             |         |
|--------------------------------------------------------|---------------------|--------|---------------------|--------------|---------------------|-------------------------------------|-------------|---------|
|                                                        | No.                 | %      | OR                  | 95% CI       | P Value             | OR                                  | 95% CI      | P Value |
| Stroke presentation                                    |                     |        |                     |              |                     |                                     |             |         |
| Focal signs                                            |                     |        |                     |              |                     |                                     |             |         |
| Hemiparesis                                            | 17                  | (65.4) | 0.23                | (0.08–0.70)  | .01                 |                                     |             |         |
| Ataxia                                                 | 10                  | (38.5) | 2.91                | (1.06–8.02)  | .04                 |                                     |             |         |
| Nonfocal signs                                         |                     |        |                     |              |                     |                                     |             |         |
| Headache                                               | 15                  | (57.7) | 3.30                | (1.23–8.87)  | .02                 |                                     |             |         |
| Nausea/vomiting                                        | 13                  | (50.0) | 4.96                | (1.86–13.2)  | .001                |                                     |             |         |
| Seizures at presentation                               | 3                   | (11.5) | 0.31                | (0.08–1.13)  | .08                 |                                     |             |         |
| Vertigo                                                | 8                   | (30.8) | 11.2                | (2.64–47.9)  | .001                |                                     |             |         |
| Risk factors or comorbidities (not mutually exclusive) |                     |        |                     |              |                     |                                     |             |         |
| Acute systemic illness                                 |                     |        |                     |              |                     |                                     |             |         |
| Meningitis                                             | 0                   |        | –                   |              | .06 <sup>c</sup>    |                                     |             |         |
| Head trauma                                            | 10                  | (38.5) | 51.3                | (6.13–428.8) | <.0001 <sup>b</sup> | 162                                 | (10.7–3435) | <.0001  |
| Infarct characteristics at baseline                    |                     |        |                     |              |                     |                                     |             |         |
| Location                                               |                     |        |                     |              |                     |                                     |             |         |
| Vascular distribution of infarction                    |                     |        |                     |              |                     |                                     |             |         |
| Anterior circulation                                   | 11                  | (42.3) | 0.05                | (0.01–0.15)  | <.0001              |                                     |             |         |
| ACA                                                    | 2                   | (7.7)  | 0.45                | (0.09–2.13)  | .31                 |                                     |             |         |
| Lenticulostriate artery                                | 9                   | (34.6) | 0.60                | (0.24–1.49)  | .27                 |                                     |             |         |
| Superficial MCA                                        | 10                  | (38.5) | 0.20                | (0.08–0.51)  | .001                |                                     |             |         |
| Anterior choroidal artery                              | 1                   | (3.8)  | 0.62                | (0.07–5.60)  | .67                 |                                     |             |         |
| Posterior circulation                                  | 12                  | (46.2) | 34.7                | (7–172)      | <.0001              |                                     |             |         |
| Basilar artery                                         | 3                   | (11.5) | –                   |              | .01 <sup>c</sup>    |                                     |             |         |
| SCA                                                    | 7                   | (26.9) | 30.2                | (3.51–260)   | .002                |                                     |             |         |
| AICA                                                   | 1                   | (3.8)  | –                   |              | .24 <sup>c</sup>    |                                     |             |         |
| PICA                                                   | 9                   | (34.6) | 21.4                | (4.25–108)   | <.0001              |                                     |             |         |
| PCA                                                    | 6                   | (23.1) | 2.81                | (0.87–9.04)  | .08                 |                                     |             |         |
| Other location                                         | 0                   |        |                     |              | .34 <sup>c</sup>    |                                     |             |         |
| Vascular imaging findings                              |                     |        |                     |              |                     |                                     |             |         |
| Pathologic finding                                     |                     |        |                     |              |                     |                                     |             |         |
| Occlusion                                              | 21                  | (80.8) | 3.38                | (1.16–9.82)  | .03                 |                                     |             |         |
| Stenosis                                               | 14                  | (53.8) | 0.45                | (0.18–1.11)  | .08                 |                                     |             |         |
| Irregularity                                           | 12                  | (46.2) | 0.72                | (0.30–1.75)  | .47                 |                                     |             |         |
| Ectasia or fusiform aneurysm or pseudoaneurysm         | 3                   | (11.5) | 2.03                | (0.45–9.17)  | .36                 |                                     |             |         |
| Intimal flap or mural hematoma                         | 3                   | (11.5) | –                   |              | .01 <sup>c</sup>    |                                     |             |         |
| Pathologically affected vessels                        |                     |        |                     |              |                     |                                     |             |         |
| Vascular territories affected                          |                     |        |                     |              |                     |                                     |             |         |
| >1                                                     | 4                   | (15.4) | Reference           |              |                     |                                     |             |         |
| 1                                                      | 22                  | (84.6) | 6.51                | (2.06–20.6)  | .001                |                                     |             |         |
| Side affected                                          |                     |        |                     |              |                     |                                     |             |         |
| Bilateral                                              | 4                   | (15.4) | Reference           |              |                     |                                     |             |         |
| Unilateral                                             | 22                  | (84.6) | 6.51                | (2.06–20.6)  | .001                |                                     |             |         |
| Segment affected                                       |                     |        |                     |              |                     |                                     |             |         |
| Supraclinoid ICA                                       | 9                   | (34.6) | 0.22                | (0.08–0.55)  | .001                |                                     |             |         |
| Proximal MCA (M1)                                      | 10                  | (38.5) | 0.06                | (0.02–0.17)  | <.0001              |                                     |             |         |
| Vertebrobasilar                                        | 16                  | (61.5) | 7.89                | (2.97–20.9)  | <.0001              |                                     |             |         |
| Cervical arteries                                      | 18                  | (69.2) | 18.5                | (6.27–54.6)  | <.0001 <sup>b</sup> | 29.3                                | (5.43–159)  | <.0001  |

**Note:**—ACA indicates anterior cerebral artery; SCA, superior cerebellar artery; PCA, posterior cerebral artery; SCA, superior cerebellar artery; AICA, anterior inferior cerebellar artery; PIC, posterior inferior cerebellary artery; –, cannot be calculated.

<sup>a</sup> Full list of variables tested is shown in On-line Table 5.

<sup>b</sup> Remains significant ( $P < .05$ ) in the multivariable model after stepwise regression ( $P < .05$ ).

<sup>c</sup>  $P$  value was calculated with the Fisher exact test.

**On-line Table 3: FCA-i—clinical and imaging characteristics that distinguish FCA-i (n = 25) compared with all other definite arteriopathy subgroups (n = 84)<sup>a</sup>**

| Characteristic                                           | Prevalence<br>(n = 25) |            | Univariate Analyses |              |                     | Multivariable Analysis <sup>b</sup> |             |         |
|----------------------------------------------------------|------------------------|------------|---------------------|--------------|---------------------|-------------------------------------|-------------|---------|
|                                                          | No.                    | %          | OR                  | 95% CI       | P Value             | OR                                  | 95% CI      | P Value |
| Demographics                                             |                        |            |                     |              |                     |                                     |             |         |
| Age by category                                          |                        |            |                     |              |                     |                                     |             |         |
| 0–3 yr                                                   | 2                      | (8.0)      | Reference           |              |                     |                                     |             |         |
| 4–7 yr                                                   | 7                      | (28.0)     | 3.27                | (0.63–17.1)  | .16                 |                                     |             |         |
| 8–11 yr                                                  | 6                      | (24.0)     | 7.64                | (1.33–43.8)  | .02                 |                                     |             |         |
| 12–15 yr                                                 | 8                      | (32.0)     | 18.7                | (3.14–111)   | .001                |                                     |             |         |
| 16–18 yr                                                 | 2                      | (8.0)      | 3.11                | (0.38–25.4)  | .29                 |                                     |             |         |
| Stroke presentation                                      |                        |            |                     |              |                     |                                     |             |         |
| Focal signs                                              |                        |            |                     |              |                     |                                     |             |         |
| Dysarthria                                               | 13                     | (52.0)     | 3.68                | (1.36–9.96)  | .01 <sup>c</sup>    | 8.34                                | (1.50–46.3) | .02     |
| Aphasia                                                  | 8                      | (32.0)     | 4.19                | (1.00–17.6)  | .05                 |                                     |             |         |
| Nonfocal signs                                           |                        |            |                     |              |                     |                                     |             |         |
| Headache                                                 | 16                     | (64.0)     | 3.19                | (1.22–8.30)  | .02                 |                                     |             |         |
| Risk factors or comorbidities (not mutually exclusive)   |                        |            |                     |              |                     |                                     |             |         |
| Meningitis                                               | 0                      |            | –                   |              | .07 <sup>b</sup>    |                                     |             |         |
| Head trauma                                              | 0                      |            | –                   |              | .07 <sup>b</sup>    |                                     |             |         |
| Infarct characteristics at baseline                      |                        |            |                     |              |                     |                                     |             |         |
| Location                                                 |                        |            |                     |              |                     |                                     |             |         |
| Vascular distribution of infarction                      |                        |            |                     |              |                     |                                     |             |         |
| Anterior circulation                                     | 25                     | (100.0)    | –                   |              | .006 <sup>b</sup>   |                                     |             |         |
| ACA                                                      | 0                      |            | –                   |              | .02 <sup>b</sup>    |                                     |             |         |
| Lenticulostriate artery                                  | 19                     | (76.0)     | 6.01                | (2.16–16.7)  | .001 <sup>c</sup>   | 45.6                                | (4.81–433)  | .001    |
| Superficial MCA                                          | 14                     | (56.0)     | 0.54                | (0.22–1.35)  | .19                 |                                     |             |         |
| Anterior choroidal artery                                | 4                      | (16.0)     | 7.81                | (1.34–45.6)  | .02                 |                                     |             |         |
| Posterior circulation                                    | 0                      |            | –                   |              | .04 <sup>b</sup>    |                                     |             |         |
| Infarct side                                             |                        |            |                     |              |                     |                                     |             |         |
| Unilateral                                               | 25                     | (100.0)    |                     |              | .001 <sup>b</sup>   |                                     |             |         |
| Bilateral                                                | 0                      |            |                     |              |                     |                                     |             |         |
| Largest infarct volume (median) (IQR) (cm <sup>3</sup> ) | 13.8                   | (3.3–20.1) |                     |              |                     |                                     |             |         |
| Volume <25 cm <sup>3</sup>                               | 20                     | (80.0)     | 6.84                | (2.33–20.0)  | <.0001 <sup>c</sup> | 5.48                                | (1.31–23.0) | .02     |
| Vascular imaging findings                                |                        |            |                     |              |                     |                                     |             |         |
| Pathologic finding                                       |                        |            |                     |              |                     |                                     |             |         |
| Occlusion                                                | 10                     | (40.0)     | 0.32                | (0.13–0.79)  | .01                 |                                     |             |         |
| Stenosis                                                 | 15                     | (60.0)     | 0.64                | (0.25–1.61)  | .34                 |                                     |             |         |
| Irregularity                                             | 15                     | (60.0)     | 1.5                 | (0.61–3.72)  | .38                 |                                     |             |         |
| Banding                                                  | 6                      | (24.0)     | 26.2                | (2.98–230)   | .003 <sup>c</sup>   | 193                                 | (1.72–22K)  | .03     |
| Pathologically affected vessels                          |                        |            |                     |              |                     |                                     |             |         |
| Arterial segments affected                               |                        |            |                     |              |                     |                                     |             |         |
| >1                                                       | 18                     | (72.0)     | Reference           |              |                     |                                     |             |         |
| 1                                                        | 7                      | (28.0)     | 3.69                | (1.19–11.5)  | .02 <sup>c</sup>    | 18.9                                | (1.49–240)  | .02     |
| Vascular territories affected                            |                        |            |                     |              |                     |                                     |             |         |
| >1                                                       | 0                      |            |                     |              | <.0001 <sup>b</sup> |                                     |             |         |
| 1                                                        | 25                     | (100.0)    | –                   |              |                     |                                     |             |         |
| Side affected                                            |                        |            |                     |              |                     |                                     |             |         |
| Bilateral                                                | 0                      |            | –                   |              | <.0001 <sup>b</sup> |                                     |             |         |
| Unilateral                                               | 25                     | (100.0)    | –                   |              |                     |                                     |             |         |
| Segment affected                                         |                        |            |                     |              |                     |                                     |             |         |
| Supraclinoid ICA                                         | 10                     | (40.0)     | 0.3                 | (0.12–0.75)  | .01                 |                                     |             |         |
| Proximal MCA (M1)                                        | 24                     | (96.0)     | 8.52                | (1.09–66.7)  | .04 <sup>a</sup>    | 24.2                                | (1.45–405)  | .03     |
| Vertebrobasilar                                          | 0                      |            | –                   |              |                     |                                     |             |         |
| Cervical arteries                                        | 1                      | (4.0)      | 0.09                | (0.01–10.72) | .02                 |                                     |             |         |

**Note:**—IQR indicates interquartile range; –, cannot be calculated; K, thousands; ACA, anterior cerebral artery.

<sup>a</sup> Full list of variables tested is shown in On-line Table 5.

<sup>b</sup> P value was calculated with the Fisher exact test.

<sup>c</sup> Remains significant ( $P < .05$ ) in the multivariable model after stepwise regression ( $P < .05$ ).

**On-line Table 4: Moyamoya disease—clinical and imaging characteristics that distinguish Moyamoya disease (n = 34) compared with all other definite arteriopathy subgroups (n = 75)<sup>a</sup>**

| Characteristic                                         | Prevalence<br>(n = 34) |        | Univariate Analyses |             |                     | Multivariable Analysis <sup>b</sup> |               |         |
|--------------------------------------------------------|------------------------|--------|---------------------|-------------|---------------------|-------------------------------------|---------------|---------|
|                                                        | No.                    | %      | OR                  | 95% CI      | P Value             | OR                                  | 95% CI        | P Value |
| Demographics                                           |                        |        |                     |             |                     |                                     |               |         |
| Race                                                   |                        |        |                     |             |                     |                                     |               |         |
| White                                                  | 16                     | (47.1) | Reference           |             |                     |                                     |               |         |
| Black                                                  | 10                     | (29.4) | 7.65                | (2.11–27.8) | .002 <sup>b</sup>   | 43.2                                | (2.38–781)    | .01     |
| Indian/South Asian                                     | 2                      | (5.9)  | 0.51                | (0.10–2.53) | .41                 |                                     |               |         |
| East Asian                                             | 1                      | (2.9)  | 1.53                | (0.13–18.0) | .74                 |                                     |               |         |
| Middle Eastern                                         | 0                      |        | –                   |             |                     |                                     |               |         |
| First Nations/Aboriginal                               | 0                      |        | –                   |             |                     |                                     |               |         |
| Mixed or other                                         | 3                      | (8.8)  | 1.53                | (0.34–6.84) | .58                 |                                     |               |         |
| Unknown                                                | 2                      | (5.9)  | 6.13                | (0.52–72.1) | .15                 |                                     |               |         |
| Stroke presentation                                    |                        |        |                     |             |                     |                                     |               |         |
| Nonfocal signs                                         |                        |        |                     |             |                     |                                     |               |         |
| Headache                                               | 3                      | (8.8)  | 0.08                | (0.02–0.30) | <.0001              |                                     |               |         |
| Decreased level of consciousness                       | 4                      | (11.8) | 0.27                | (0.09–0.87) | .03 <sup>a</sup>    | 0.01                                | (0.0009–0.19) | .002    |
| Vertigo                                                | 0                      |        | –                   |             | .01 <sup>c</sup>    |                                     |               |         |
| Risk factors or comorbidities (not mutually exclusive) |                        |        |                     |             |                     |                                     |               |         |
| Other chronic disorders                                |                        |        |                     |             |                     |                                     |               |         |
| Sickle cell anemia                                     | 9                      | (26.5) | –                   |             | <.0001 <sup>c</sup> |                                     |               |         |
| Down syndrome                                          | 6                      | (17.6) | 15.9                | (1.83–138)  | .01 <sup>b</sup>    | 2099                                | (134–328K)    | .003    |
| Acute systemic illness                                 |                        |        |                     |             |                     |                                     |               |         |
| Infection reported in prior 7 days                     | 8                      | (23.5) | 3.54                | (1.12–11.2) | .03 <sup>b</sup>    | 30.0                                | (1.58–569)    | .02     |
| Meningitis                                             | 0                      |        | –                   |             | .02 <sup>c</sup>    |                                     |               |         |
| Dehydration                                            | 4                      | (11.8) | 9.87                | (1.06–91.9) | .04                 |                                     |               |         |
| Infarct characteristics at baseline                    |                        |        |                     |             |                     |                                     |               |         |
| Location                                               |                        |        |                     |             |                     |                                     |               |         |
| Vascular distribution of infarction                    |                        |        |                     |             |                     |                                     |               |         |
| Anterior circulation                                   |                        |        |                     |             |                     |                                     |               |         |
| ACA                                                    | 5                      | (14.7) | 1.12                | (0.35–3.57) | .85                 |                                     |               |         |
| Lenticulostriate artery                                | 8                      | (23.5) | 0.27                | (0.11–0.67) | .005                |                                     |               |         |
| Superficial MCA                                        | 30                     | (88.2) | 5.58                | (1.79–17.4) | .003                |                                     |               |         |
| Anterior choroidal artery                              | 0                      |        | –                   |             | .17 <sup>c</sup>    |                                     |               |         |
| Posterior circulation                                  |                        |        |                     |             |                     |                                     |               |         |
| Basilar artery                                         | 0                      |        | –                   |             | .005 <sup>c</sup>   |                                     |               |         |
| SCA                                                    | 0                      |        | –                   |             | .55 <sup>c</sup>    |                                     |               |         |
| SCA                                                    | 0                      |        | –                   |             | .06 <sup>c</sup>    |                                     |               |         |
| AICA                                                   | 0                      |        | –                   |             | 1.00 <sup>c</sup>   |                                     |               |         |
| PICA                                                   | 0                      |        | –                   |             | .02 <sup>c</sup>    |                                     |               |         |
| PCA                                                    | 0                      |        | –                   |             | .005 <sup>c</sup>   |                                     |               |         |
| Other location                                         | 4                      | (11.8) | 9.87                | (1.06–91.9) | .04                 |                                     |               |         |
| Vascular imaging findings                              |                        |        |                     |             |                     |                                     |               |         |
| Pathologic finding                                     |                        |        |                     |             |                     |                                     |               |         |
| Occlusion                                              |                        |        |                     |             |                     |                                     |               |         |
| Vascular territories affected                          |                        |        |                     |             |                     |                                     |               |         |
| >1                                                     | 25                     | (73.5) | 2.18                | (0.90–5.30) | .09                 |                                     |               |         |
| 1                                                      | 3                      | (8.8)  | Reference           |             |                     | 325.0                               | (19.1–5522)   | <.0001  |
| Segment affected                                       |                        |        |                     |             |                     |                                     |               |         |
| Supraclinoid ICA                                       | 32                     | (94.1) | 17.3                | (3.87–77.6) | <.0001 <sup>b</sup> | 61.0                                | (2.32–1602)   | .01     |
| Proximal MCA (M1)                                      | 32                     | (94.1) | 6.22                | (1.37–28.3) | .02                 |                                     |               |         |
| Vertebrobasilar                                        | 7                      | (20.6) | 0.59                | (0.22–1.54) | .28                 |                                     |               |         |
| Cervical arteries                                      | 6                      | (17.6) | 0.55                | (0.20–1.52) | .25                 |                                     |               |         |

**Note:**— indicates that cannot be calculated; K, thousands; ACA, anterior cerebral artery; SCA, superior cerebellar artery; PCA, posterior cerebral artery.

<sup>a</sup> Full list of variables tested is shown in On-line Table 5.

<sup>b</sup> Remains significant ( $P < .05$ ) in the multivariable model after stepwise regression ( $P < .05$ ).

<sup>c</sup>  $P$  value was calculated with the Fisher exact test.

**On-line Table 5: Cardioembolism—prevalence, univariate and multivariable analyses of demographics, and clinical and imaging characteristics for patients with cardioembolism (n = 65) versus those with definite arteriopathy (n = 109)**

| Characteristic                                         | Prevalence in Cardioembolic Cases (n = 65) |         | Prevalence in Arteriopathic Cases (n = 109) |        | Univariate Analyses |             |                     | Multivariable Analysis <sup>b</sup> |            |                   |
|--------------------------------------------------------|--------------------------------------------|---------|---------------------------------------------|--------|---------------------|-------------|---------------------|-------------------------------------|------------|-------------------|
|                                                        | No.                                        | %       | No.                                         | %      | OR                  | 95% CI      | P Value             | OR                                  | 95% CI     | P Value           |
| Demographics                                           |                                            |         |                                             |        |                     |             |                     |                                     |            |                   |
| Age by category                                        |                                            |         |                                             |        |                     |             |                     |                                     |            |                   |
| 0–3 yr                                                 | 29                                         | (44.6)  | 30                                          | (27.5) | Reference           |             |                     |                                     |            |                   |
| 4–7 yr                                                 | 8                                          | (12.3)  | 37                                          | (33.9) | 0.22                | (0.09–0.56) | .001                |                                     |            |                   |
| 8–11 yr                                                | 7                                          | (10.8)  | 17                                          | (15.6) | 0.43                | (0.15–1.18) | .10                 |                                     |            |                   |
| 12–15 yr                                               | 11                                         | (16.9)  | 14                                          | (12.8) | 0.81                | (0.32–2.08) | .67                 |                                     |            |                   |
| 16–18 yr                                               | 10                                         | (15.4)  | 11                                          | (10.1) | 0.94                | (0.35–2.55) | .90                 |                                     |            |                   |
| Male sex                                               | 34                                         | (52.3)  | (58.0)                                      | (53.2) | 0.96                | (0.52–1.78) | .91                 |                                     |            |                   |
| Race                                                   |                                            |         |                                             |        |                     |             |                     |                                     |            |                   |
| White                                                  | 45                                         | (69.2)  | 65                                          | (59.6) | Reference           |             |                     |                                     |            |                   |
| Black                                                  | 4                                          | (6.2)   | 14                                          | (12.8) | 0.41                | (0.13–1.34) | .4                  |                                     |            |                   |
| Indian/South Asian                                     | 4                                          | (6.2)   | 14                                          | (12.8) | 0.41                | (0.13–1.34) | .14                 |                                     |            |                   |
| East Asian                                             | 2                                          | (3.1)   | 3                                           | (2.8)  | 0.96                | (0.15–6.00) | .97                 |                                     |            |                   |
| Middle Eastern                                         | 1                                          | (1.5)   | 0                                           | 0      | –                   |             |                     |                                     |            |                   |
| First Nations/Aboriginal                               | 1                                          | (1.5)   | 1                                           | (0.9)  | 1.44                | (0.09–23.7) | .80                 |                                     |            |                   |
| Mixed or other                                         | 8                                          | (12.3)  | 9                                           | (8.3)  | 1.28                | (0.46–3.58) | .63                 |                                     |            |                   |
| Unknown                                                | 0                                          |         | 3                                           | (2.8)  | –                   |             |                     |                                     |            |                   |
| Stroke presentation                                    |                                            |         |                                             |        |                     |             |                     |                                     |            |                   |
| Any focal signs (vs nonfocal only)                     | 54                                         | (83.1)  | 101                                         | (92.7) | 2.67                | (0.96–7.42) | .059                |                                     |            |                   |
| Focal signs                                            |                                            |         |                                             |        |                     |             |                     |                                     |            |                   |
| Hemiparesis                                            | 52                                         | (80.0)  | 91                                          | (83.5) | 0.91                | (0.39–2.16) | .84                 |                                     |            |                   |
| Dysarthria                                             | 14                                         | (21.5)  | 33                                          | (30.3) | 0.75                | (0.35–1.59) | .45                 |                                     |            |                   |
| Aphasia                                                | 12                                         | (18.5)  | 29                                          | (26.6) | 0.62                | (0.27–1.45) | .27                 |                                     |            |                   |
| Ataxia                                                 | 4                                          | (6.2)   | 24                                          | (22.0) | 0.23                | (0.08–0.74) | .01                 |                                     |            |                   |
| Visual field deficit                                   | 10                                         | (15.4)  | 11                                          | (10.1) | 1.68                | (0.66–4.30) | .28                 |                                     |            |                   |
| Nonfocal signs                                         |                                            |         |                                             |        |                     |             |                     |                                     |            |                   |
| Headache                                               | 12                                         | (18.5)  | 40                                          | (36.7) | 0.47                | (0.22–1.03) | .06                 |                                     |            |                   |
| Decreased level of consciousness                       | 20                                         | (30.8)  | 30                                          | (27.5) | 1.37                | (0.68–2.75) | .37                 |                                     |            |                   |
| Nausea/vomiting                                        | 5                                          | (7.7)   | 28                                          | (25.7) | 0.26                | (0.09–0.72) | .009                |                                     |            |                   |
| Seizures at presentation                               | 15                                         | (23.1)  | 27                                          | (24.8) | 0.97                | (0.47–2.00) | .93                 |                                     |            |                   |
| Vertigo                                                | 4                                          | (6.2)   | 11                                          | (10.1) | 0.60                | (0.18–2.01) | .41                 |                                     |            |                   |
| Diplopia                                               | 1                                          | (1.5)   | 1                                           | (0.9)  | 1.87                | (0.11–30.6) | .66                 |                                     |            |                   |
| Risk factors or comorbidities (not mutually exclusive) |                                            |         |                                             |        |                     |             |                     |                                     |            |                   |
| Cardiac disease                                        | 65                                         | (100.0) | 6                                           | (5.5)  |                     |             | <.0001 <sup>a</sup> |                                     |            |                   |
| CHD only                                               | 42                                         | (64.6)  | 6                                           | (5.5)  |                     |             |                     | 101.6                               | (17.3–596) | <.0001            |
| AHD only                                               | 19                                         | (29.2)  | 0                                           |        |                     |             |                     |                                     |            |                   |
| Both CHD and AHD                                       | 4                                          | (6.2)   | 0                                           |        |                     |             |                     |                                     |            |                   |
| Other chronic disorders                                |                                            |         |                                             |        |                     |             |                     |                                     |            |                   |
| Sickle cell anemia                                     | 0                                          |         | 9                                           | (8.3)  | –                   |             |                     |                                     |            | .03 <sup>a</sup>  |
| Down syndrome                                          | 1                                          | (1.5)   | 7                                           | (6.4)  | 0.23                | (0.03–1.89) | .17                 |                                     |            |                   |
| Other genetic syndrome                                 | 5                                          | (7.7)   | 4                                           | (3.7)  | 2.19                | (0.57–8.46) | .26                 |                                     |            |                   |
| Migraine                                               | 1                                          | (1.5)   | 3                                           | (2.8)  | 0.55                | (0.06–5.42) | .61                 |                                     |            |                   |
| Prothrombotic state                                    | 4                                          | (6.2)   | 2                                           | (1.8)  | 3.51                | (0.62–19.7) | .15                 |                                     |            |                   |
| Indwelling catheter                                    | 5                                          | (7.7)   | 1                                           | (0.9)  | 9.00                | (1.03–78.8) | .05                 |                                     |            |                   |
| Iron deficiency anemia                                 | 1                                          | (1.5)   | 4                                           | (3.7)  | 0.41                | (0.04–3.75) | .43                 |                                     |            |                   |
| Connective tissue disease                              | 0                                          |         | 1                                           | (0.9)  | –                   |             |                     |                                     |            | 1.00 <sup>a</sup> |
| Ventriculoperitoneal shunt                             | 0                                          |         | 1                                           | (0.9)  | –                   |             |                     |                                     |            | 1.00 <sup>a</sup> |
| Acute systemic illness                                 |                                            |         |                                             |        |                     |             |                     |                                     |            |                   |
| Infection reported in prior week                       | 14                                         | (21.5)  | 14                                          | (12.8) | 1.86                | (0.82–4.21) | .14                 |                                     |            |                   |
| Systemic sepsis or bacteremia                          | 5                                          | (7.7)   | 6                                           | (5.5)  | 1.43                | (0.42–4.89) | .57                 |                                     |            |                   |
| Meningitis                                             | 0                                          |         | 11                                          | (10.1) | –                   |             |                     |                                     |            | .008 <sup>a</sup> |
| Dehydration                                            | 6                                          | (9.2)   | 5                                           | (4.6)  | 2.12                | (0.62–7.22) | .23                 |                                     |            |                   |
| Head trauma                                            | 3                                          | (4.6)   | 11                                          | (10.1) | 0.43                | (0.12–1.61) | .21                 |                                     |            |                   |
| Infarct characteristics at baseline                    |                                            |         |                                             |        |                     |             |                     |                                     |            |                   |
| Location                                               |                                            |         |                                             |        |                     |             |                     |                                     |            |                   |
| Vascular distribution of infarction                    |                                            |         |                                             |        |                     |             |                     |                                     |            |                   |
| Anterior circulation                                   |                                            |         |                                             |        |                     |             |                     |                                     |            |                   |
| ACA                                                    | 54                                         | (83.1)  | 89                                          | (81.7) | 1.10                | (0.49–2.48) | .81                 |                                     |            |                   |
| Lenticulostriate artery                                | 7                                          | (10.8)  | 15                                          | (13.8) | 0.76                | (0.29–1.97) | .57                 |                                     |            |                   |
| Superficial MCA                                        | 27                                         | (41.5)  | 48                                          | (44.0) | 0.90                | (0.48–1.68) | .75                 |                                     |            |                   |
| Anterior choroidal artery                              | 47                                         | (72.3)  | 73                                          | (67.0) | 1.29                | (0.66–2.53) | .46                 |                                     |            |                   |
| Posterior circulation                                  | 1                                          | (1.5)   | 6                                           | (5.5)  | 0.27                | (0.03–2.28) | .23                 |                                     |            |                   |
| Basilar artery                                         | 19                                         | (29.2)  | 14                                          | (12.8) | 1.39                | (0.69–2.78) | .36                 |                                     |            |                   |
| Basilar artery                                         | 1                                          | (1.5)   | 3                                           | (2.8)  | 0.55                | (0.06–5.42) | .61                 |                                     |            |                   |
| SCA                                                    | 1                                          | (1.5)   | 8                                           | (7.3)  | 0.20                | (0.02–1.61) | .13                 |                                     |            |                   |
| AICA                                                   | 0                                          |         | 1                                           | (0.9)  | –                   |             |                     |                                     |            | 1.00 <sup>a</sup> |
| PICA                                                   | 7                                          | (10.8)  | 11                                          | (10.1) | 1.08                | (0.39–2.93) | .89                 |                                     |            |                   |
| PCA                                                    | 13                                         | (20.0)  | 14                                          | (12.8) | 1.70                | (0.74–3.88) | .21                 |                                     |            |                   |
| Other location                                         | 2                                          | (3.1)   | 5                                           | (4.6)  | 0.66                | (0.12–3.51) | .63                 |                                     |            |                   |
| Infarct side                                           |                                            |         |                                             |        |                     |             |                     |                                     |            |                   |
| Unilateral                                             | 43                                         | (66.2)  | 83                                          | (76.1) | Reference           |             |                     |                                     |            |                   |
| Bilateral                                              | 22                                         | (33.8)  | 26                                          | (23.9) | 1.63                | (0.83–3.21) | .16                 |                                     |            |                   |

Continued on next page

**On-line Table 5: Continued**

| Characteristic                                           | Prevalence in Cardioembolic Cases (n = 65) |             | Prevalence in Arteriopathic Cases (n = 109) |            | Univariate Analyses |             |                     | Multivariable Analysis <sup>b</sup> |             |         |
|----------------------------------------------------------|--------------------------------------------|-------------|---------------------------------------------|------------|---------------------|-------------|---------------------|-------------------------------------|-------------|---------|
|                                                          | No.                                        | %           | No.                                         | %          | OR                  | 95% CI      | P Value             | OR                                  | 95% CI      | P Value |
| Largest infarct volume (median) (IQR) (cm <sup>3</sup> ) | 18.5                                       | (4.21–58.8) | 28                                          | (6.5–88.9) |                     |             |                     |                                     |             |         |
| Volume <25 cm <sup>3</sup>                               | 38                                         | (58.5)      | 58                                          | (53.2)     | 1.60                | (0.86–2.98) | .14                 |                                     |             |         |
| Vascular imaging findings                                |                                            |             |                                             |            |                     |             |                     |                                     |             |         |
| Pathologic finding                                       |                                            |             |                                             |            |                     |             |                     |                                     |             |         |
| Occlusion                                                | 31                                         | (47.7)      | 67                                          | (61.5)     | 0.57                | (0.31–1.06) | .08                 |                                     |             |         |
| Stenosis                                                 | 7                                          | (10.8)      | 74                                          | (67.9)     | 0.06                | (0.02–0.14) | <.0001 <sup>b</sup> | 0.07                                | (0.02–0.28) | <.0001  |
| Irregularity                                             | 6                                          | (9.2)       | 57                                          | (52.3)     | 0.09                | (0.04–0.23) | <.0001 <sup>b</sup> | 0.09                                | (0.02–0.34) | <.0001  |
| Ectasia or fusiform aneurysm or pseudoaneurysm           | 1                                          | (1.5)       | 8                                           | (7.3)      | 0.20                | (0.02–1.61) | .13                 |                                     |             |         |
| Banding                                                  | 0                                          |             | 7                                           | (6.4)      | –                   |             | .05 <sup>a</sup>    |                                     |             |         |
| Intimal flap or mural hematoma                           | 0                                          |             | 3                                           | (2.8)      | –                   |             | .29 <sup>a</sup>    |                                     |             |         |
| Pathologically affected vessels                          |                                            |             |                                             |            |                     |             |                     |                                     |             |         |
| Arterial segments affected                               |                                            |             |                                             |            |                     |             |                     |                                     |             |         |
| >1                                                       | 24                                         | (36.9)      | 94                                          | (86.2)     | Reference           |             |                     |                                     |             |         |
| 1                                                        | 41                                         | (63.1)      | 15                                          | (13.8)     | 10.7                | (5.10–22.5) | <.0001              |                                     |             |         |
| Vascular territories affected                            |                                            |             |                                             |            |                     |             |                     |                                     |             |         |
| >1                                                       | 7                                          | (10.8)      | 49                                          | (45.0)     | Reference           |             |                     |                                     |             |         |
| 1                                                        | 58                                         | (89.2)      | 60                                          | (55.0)     | 6.77                | (2.83–16.2) | <.0001 <sup>b</sup> | 6.63                                | (1.40–31.3) | .02     |
| Side affected                                            |                                            |             |                                             |            |                     |             |                     |                                     |             |         |
| Bilateral                                                | 6                                          | (9.2)       | 49                                          | (45.0)     | Reference           |             |                     |                                     |             |         |
| Unilateral                                               | 59                                         | (90.8)      | 60                                          | (55.0)     | 4.08                | (1.57–10.6) | .004                |                                     |             |         |
| Segment affected                                         |                                            |             |                                             |            |                     |             |                     |                                     |             |         |
| Supraclinoid ICA                                         | 12                                         | (18.5)      | 68                                          | (62.4)     | 0.14                | (0.07–0.29) | <.0001              |                                     |             |         |
| Proximal MCA (M1)                                        | 25                                         | (38.5)      | 86                                          | (78.9)     | 0.17                | (0.08–0.33) | <.0001              |                                     |             |         |
| Vertebrobasilar artery                                   | 7                                          | (10.8)      | 30                                          | (27.5)     | 0.32                | (0.13–0.77) | .01                 |                                     |             |         |
| Cervical arteries                                        | 9                                          | (13.8)      | 27                                          | (24.8)     | 0.49                | (0.21–1.12) | .09                 |                                     |             |         |

**Note:**— – indicates that cannot be calculated; ACA, anterior cerebral artery; SCA, superior cerebellar artery; PCA, posterior cerebral artery; CHD, congenital heart disease; AHD, acquired heart disease; IQR, interquartile range.

<sup>a</sup> P value was calculated with the Fisher exact test.

<sup>b</sup> Remains significant (P < .05) in the multivariable model after stepwise regression (P < .05).

**On-line Table 6: Dissection—prevalence and univariate analyses of characteristics associated with arterial dissection (n = 26) compared with all other definite arteriopathy subtypes (n = 83)**

| Characteristic                                                | Prevalence (n = 26) |            | Univariate Analyses |              |                     | Multivariable Analysis <sup>a</sup> |             |         |
|---------------------------------------------------------------|---------------------|------------|---------------------|--------------|---------------------|-------------------------------------|-------------|---------|
|                                                               | No.                 | %          | OR                  | 95% CI       | P Value             | OR                                  | 95% CI      | P Value |
| <b>Demographics</b>                                           |                     |            |                     |              |                     |                                     |             |         |
| Age by category                                               |                     |            |                     |              |                     |                                     |             |         |
| 0–3 yr                                                        | 6                   | (23.1)     | Reference           |              |                     |                                     |             |         |
| 4–7 yr                                                        | 8                   | (30.8)     | 1.10                | (0.34–3.62)  | .87                 |                                     |             |         |
| 8–11 yr                                                       | 5                   | (19.2)     | 1.67                | (0.42–6.59)  | .47                 |                                     |             |         |
| 12–15 yr                                                      | 3                   | (11.5)     | 1.09                | (0.23–5.19)  | .91                 |                                     |             |         |
| 16–18 yr                                                      | 4                   | (15.4)     | 2.29                | (0.50–10.4)  | .29                 |                                     |             |         |
| Male sex                                                      | 16                  | (61.5)     | 1.56                | (0.64–3.84)  | .33                 |                                     |             |         |
| Race                                                          |                     |            |                     |              |                     |                                     |             |         |
| White                                                         | 19                  | (73.1)     | Reference           |              |                     |                                     |             |         |
| Black                                                         | 0                   |            | –                   |              |                     |                                     |             |         |
| Indian/South Asian                                            | 2                   | (7.7)      | 0.40                | (0.08–1.98)  | .26                 |                                     |             |         |
| East Asian                                                    | 1                   | (3.8)      | 1.21                | (0.10–13.2)  | .88                 |                                     |             |         |
| Middle Eastern                                                | 0                   |            | –                   |              |                     |                                     |             |         |
| First Nations/Aboriginal                                      | 0                   |            | –                   |              |                     |                                     |             |         |
| Mixed or other                                                | 4                   | (15.4)     | 1.94                | (0.47–8.01)  | .36                 |                                     |             |         |
| Unknown                                                       | 0                   |            | –                   |              |                     |                                     |             |         |
| <b>Stroke presentation</b>                                    |                     |            |                     |              |                     |                                     |             |         |
| Focal signs                                                   |                     |            |                     |              |                     |                                     |             |         |
| Hemiparesis                                                   | 17                  | (65.4)     | 0.23                | (0.08–0.70)  | .01                 |                                     |             |         |
| Dysarthria                                                    | 7                   | (26.9)     | 0.81                | (0.29–2.24)  | .68                 |                                     |             |         |
| Aphasia                                                       | 4                   | (15.4)     | 0.21                | (0.09–1.13)  | .08                 |                                     |             |         |
| Ataxia                                                        | 10                  | (38.5)     | 2.91                | (1.06–8.02)  | .04                 |                                     |             |         |
| Visual field deficit                                          | 3                   | (11.5)     | 1.09                | (0.26–4.52)  | .91                 |                                     |             |         |
| Nonfocal signs                                                |                     |            |                     |              |                     |                                     |             |         |
| Headache                                                      | 15                  | (57.7)     | 3.30                | (1.23–8.87)  | .02                 |                                     |             |         |
| Decreased level of consciousness                              | 9                   | (34.6)     | 1.39                | (0.54–3.59)  | .50                 |                                     |             |         |
| Nausea/vomiting                                               | 13                  | (50.0)     | 4.96                | (1.86–13.2)  | .001                |                                     |             |         |
| Seizures at presentation                                      | 3                   | (11.5)     | 0.31                | (0.08–1.13)  | .08                 |                                     |             |         |
| Vertigo                                                       | 8                   | (30.8)     | 11.2                | (2.64–47.9)  | .001                |                                     |             |         |
| Diplopia                                                      | 0                   |            | –                   |              | 1.00 <sup>b</sup>   |                                     |             |         |
| <b>Risk factors or comorbidities (not mutually exclusive)</b> |                     |            |                     |              |                     |                                     |             |         |
| CHD and/or AHD                                                | 1                   | (3.8)      | 0.62                | (0.07–5.60)  | .67                 |                                     |             |         |
| CHD only                                                      | 1                   | (3.8)      | 0.62                | (0.07–5.60)  | .67                 |                                     |             |         |
| AHD only                                                      | 0                   |            | –                   |              |                     |                                     |             |         |
| Both CHD and AHD                                              | 0                   |            | –                   |              |                     |                                     |             |         |
| Other chronic disorders                                       |                     |            |                     |              |                     |                                     |             |         |
| Sickle cell anemia                                            | 0                   |            | –                   |              | .11 <sup>b</sup>    |                                     |             |         |
| Down syndrome                                                 | 0                   |            | –                   |              | .19 <sup>b</sup>    |                                     |             |         |
| Other genetic syndrome                                        | 0                   |            | –                   |              | .57 <sup>b</sup>    |                                     |             |         |
| Migraine                                                      | 2                   | (7.7)      | 6.83                | (0.59–78.6)  | .12                 |                                     |             |         |
| Prothrombotic state                                           | 0                   |            | –                   |              | 1.00 <sup>b</sup>   |                                     |             |         |
| Oral contraceptives (females only)                            | 0                   |            | –                   |              | 1.00 <sup>b</sup>   |                                     |             |         |
| Indwelling catheter                                           | 0                   |            | –                   |              | 1.00 <sup>b</sup>   |                                     |             |         |
| Iron deficiency anemia                                        | 1                   | (3.8)      | 1.07                | (0.11–10.7)  | .96                 |                                     |             |         |
| Connective tissue disease                                     | 0                   |            | –                   |              | 1.00 <sup>b</sup>   |                                     |             |         |
| Ventriculoperitoneal shunt                                    | 0                   |            | –                   |              | 1.00 <sup>b</sup>   |                                     |             |         |
| <b>Acute systemic illness</b>                                 |                     |            |                     |              |                     |                                     |             |         |
| Infection reported in prior week                              | 2                   | (7.7)      | 0.49                | (0.10–2.36)  | .38                 |                                     |             |         |
| Systemic sepsis or bacteremia                                 | 0                   |            | –                   |              | .33 <sup>b</sup>    |                                     |             |         |
| Meningitis                                                    | 0                   |            | –                   |              | .06 <sup>b</sup>    |                                     |             |         |
| Dehydration                                                   | 0                   |            | –                   |              | .34 <sup>b</sup>    |                                     |             |         |
| Head trauma                                                   | 10                  | (38.5)     | 51.3                | (6.13–428.8) | <.0001 <sup>a</sup> | 162                                 | (10.7–3435) | <.0001  |
| <b>Infarct characteristics at baseline</b>                    |                     |            |                     |              |                     |                                     |             |         |
| Location                                                      |                     |            |                     |              |                     |                                     |             |         |
| Vascular distribution of infarction                           |                     |            |                     |              |                     |                                     |             |         |
| Anterior circulation                                          | 11                  | (42.3)     | 0.05                | (0.01–0.15)  | <.0001              |                                     |             |         |
| ACA                                                           | 2                   | (7.7)      | 0.45                | (0.09–2.13)  | .31                 |                                     |             |         |
| Lenticulostriate artery                                       | 9                   | (34.6)     | 0.60                | (0.24–1.49)  | .27                 |                                     |             |         |
| Superficial MCA                                               | 10                  | (38.5)     | 0.20                | (0.08–0.51)  | .001                |                                     |             |         |
| Anterior choroidal artery                                     | 1                   | (3.8)      | 0.62                | (0.07–5.60)  | .67                 |                                     |             |         |
| Posterior circulation                                         | 12                  | (46.2)     | 34.7                | (7–172)      | <.0001              |                                     |             |         |
| Basilar                                                       | 3                   | (11.5)     | –                   |              | .01 <sup>b</sup>    |                                     |             |         |
| SCA                                                           | 7                   | (26.9)     | 30.2                | (3.51–260)   | .002                |                                     |             |         |
| AICA                                                          | 1                   | (3.8)      | –                   |              | .24 <sup>b</sup>    |                                     |             |         |
| PICA                                                          | 9                   | (34.6)     | 21.4                | (4.25–108)   | <.0001              |                                     |             |         |
| PCA                                                           | 6                   | (23.1)     | 2.81                | (0.87–9.04)  | .08                 |                                     |             |         |
| Other location                                                | 0                   |            | –                   |              | .34 <sup>b</sup>    |                                     |             |         |
| Infarct side                                                  |                     |            |                     |              |                     |                                     |             |         |
| Unilateral                                                    | 19                  | (73.1)     | Reference           |              |                     |                                     |             |         |
| Bilateral                                                     | 7                   | (26.9)     | 1.24                | (0.45–3.40)  | .67                 |                                     |             |         |
| Largest infarct volume (median) (IQR) (cm <sup>3</sup> )      | 25.8                | (3.9–95.4) |                     |              |                     |                                     |             |         |
| Volume <25 cm <sup>3</sup>                                    | 13                  | (50.0)     | 0.84                | (0.35–2.04)  | .71                 |                                     |             |         |

Continued on next page

**On-line Table 6: Continued**

| Characteristic                                 | Prevalence (n = 26) |        | Univariate Analyses |             |                     | Multivariable Analysis <sup>a</sup> |            |         |
|------------------------------------------------|---------------------|--------|---------------------|-------------|---------------------|-------------------------------------|------------|---------|
|                                                | No.                 | %      | OR                  | 95% CI      | P Value             | OR                                  | 95% CI     | P Value |
| Vascular imaging findings                      |                     |        |                     |             |                     |                                     |            |         |
| Pathologic finding                             |                     |        |                     |             |                     |                                     |            |         |
| Occlusion                                      | 21                  | (80.8) | 3.38                | (1.16–9.82) | .03                 |                                     |            |         |
| Stenosis                                       | 14                  | (53.8) | 0.45                | (0.18–1.11) | .08                 |                                     |            |         |
| Irregularity                                   | 12                  | (46.2) | 0.72                | (0.30–1.75) | .47                 |                                     |            |         |
| Ectasia or fusiform aneurysm or pseudoaneurysm | 3                   | (11.5) | 2.03                | (0.45–9.17) | .36                 |                                     |            |         |
| Banding                                        | 1                   | (3.8)  | 0.51                | (0.06–4.47) | .55                 |                                     |            |         |
| Intimal flap or mural hematoma                 | 3                   | (11.5) | –                   |             | .01 <sup>b</sup>    |                                     |            |         |
| Pathologically affected vessels                |                     |        |                     |             |                     |                                     |            |         |
| Vascular territories affected                  |                     |        |                     |             |                     |                                     |            |         |
| >1                                             | 4                   | (15.4) | Reference           |             |                     |                                     |            |         |
| 1                                              | 22                  | (84.6) | 6.51                | (2.06–20.6) | .001                |                                     |            |         |
| Side affected                                  |                     |        |                     |             |                     |                                     |            |         |
| Bilateral                                      | 4                   | (15.4) | Reference           |             |                     |                                     |            |         |
| Unilateral                                     | 22                  | (84.6) | 6.51                | (2.06–20.6) | .001                |                                     |            |         |
| Segment affected                               |                     |        |                     |             |                     |                                     |            |         |
| Supraclinoid ICA                               | 9                   | (34.6) | 0.22                | (0.08–0.55) | .001                |                                     |            |         |
| Proximal MCA (M1)                              | 10                  | (38.5) | 0.06                | (0.02–0.17) | <.0001              |                                     |            |         |
| Vertebrobasilar artery                         | 16                  | (61.5) | 7.89                | (2.97–20.9) | <.0001              |                                     |            |         |
| Cervical arteries                              | 18                  | (69.2) | 18.5                | (6.27–54.6) | <.0001 <sup>a</sup> | 29.3                                | (5.43–159) | <.0001  |

**Note:**— indicates that cannot be calculated; ACA, anterior cerebral artery; SCA, superior cerebellar artery; PCA, posterior cerebral artery; CHD, congenital heart disease; AHD, acquired heart disease.

<sup>a</sup> Remains significant ( $P < .05$ ) in the multivariable model after stepwise regression ( $P < .05$ ).

<sup>b</sup>  $P$  value was calculated with the Fisher exact test.



**On-line Table 7: FCA-i—prevalence and univariate analyses of demographics and clinical and imaging characteristics of patients with FCA-i (n = 25) versus all other definite arteriopathy subgroups (n = 84)**

| Characteristic                                           | Prevalence (n = 25) |            | Univariate Analyses |              |                     | Multivariable Analysis <sup>a</sup> |             |         |
|----------------------------------------------------------|---------------------|------------|---------------------|--------------|---------------------|-------------------------------------|-------------|---------|
|                                                          | No.                 | %          | OR                  | 95% CI       | P Value             | OR                                  | 95% CI      | P Value |
| <b>Demographics</b>                                      |                     |            |                     |              |                     |                                     |             |         |
| Age by category                                          |                     |            |                     |              |                     |                                     |             |         |
| 0–3 yr                                                   | 2                   | (8.0)      | Reference           |              |                     |                                     |             |         |
| 4–7 yr                                                   | 7                   | (28.0)     | 3.27                | (0.63–17.1)  | .16                 |                                     |             |         |
| 8–11 yr                                                  | 6                   | (24.0)     | 7.64                | (1.33–43.8)  | .02                 |                                     |             |         |
| 12–15 yr                                                 | 8                   | (32.0)     | 18.7                | (3.14–111)   | .001                |                                     |             |         |
| 16–18 yr                                                 | 2                   | (8.0)      | 3.11                | (0.38–25.4)  | .29                 |                                     |             |         |
| Male sex                                                 | 12                  | (48.0)     | 0.76                | (0.31–1.87)  | .55                 |                                     |             |         |
| Race                                                     |                     |            |                     |              |                     |                                     |             |         |
| White                                                    | 16                  | (64.0)     | Reference           |              |                     |                                     |             |         |
| Black                                                    | 2                   | (8.0)      | 0.51                | (0.10–2.53)  | .41                 |                                     |             |         |
| Indian/South Asian                                       | 2                   | (8.0)      | 0.51                | (0.10–2.53)  | .41                 |                                     |             |         |
| East Asian                                               | 1                   | (4.0)      | 1.53                | (0.13–18.00) | .74                 |                                     |             |         |
| Middle Eastern                                           | 0                   |            | –                   |              |                     |                                     |             |         |
| First Nations/Aboriginal                                 | 1                   | (4.0)      | –                   |              |                     |                                     |             |         |
| Mixed or other                                           | 2                   | (8.0)      | 0.88                | (0.16–4.65)  | .88                 |                                     |             |         |
| Unknown                                                  | 1                   | (4.0)      | 1.53                | (0.13–18.0)  | .74                 |                                     |             |         |
| <b>Stroke presentation</b>                               |                     |            |                     |              |                     |                                     |             |         |
| Focal signs                                              |                     |            |                     |              |                     |                                     |             |         |
| Hemiparesis                                              | 24                  | (96.0)     | 5.37                | (0.67–42.9)  | .11                 | 8.34                                | (1.50–46.3) | .02     |
| Dysarthria                                               | 13                  | (52.0)     | 3.68                | (1.36–9.96)  | .01 <sup>a</sup>    |                                     |             |         |
| Aphasia                                                  | 8                   | (32.0)     | 4.19                | (1.00–17.6)  | .05                 |                                     |             |         |
| Ataxia                                                   | 7                   | (28.0)     | 1.40                | (0.49–4.01)  | .53                 |                                     |             |         |
| Visual field deficit                                     | 2                   | (8.0)      | 0.60                | (0.12–3.02)  | .54                 |                                     |             |         |
| Nonfocal signs                                           |                     |            |                     |              |                     |                                     |             |         |
| Headache                                                 | 16                  | (64.0)     | 3.19                | (1.22–8.30)  | .02                 |                                     |             |         |
| Decreased level of consciousness                         | 4                   | (16.0)     | 0.43                | (0.13–1.39)  | .16                 |                                     |             |         |
| Nausea/vomiting                                          | 3                   | (12.0)     | 0.28                | (0.08–1.04)  | .06                 |                                     |             |         |
| Seizures at presentation                                 | 4                   | (16.0)     | 0.49                | (0.15–1.58)  | .23                 |                                     |             |         |
| Vertigo                                                  | 2                   | (8.0)      | 0.55                | (0.11–2.76)  | .47                 |                                     |             |         |
| Diplopia                                                 | 0                   |            | –                   |              | 1.00 <sup>b</sup>   |                                     |             |         |
| Risk factors or comorbidities (not mutually exclusive)   |                     |            |                     |              |                     |                                     |             |         |
| Cardiac disease (CHD-AHD or both)                        | 0                   |            |                     |              | .33 <sup>b</sup>    |                                     |             |         |
| Congenital heart disease                                 | 0                   |            | –                   |              |                     |                                     |             |         |
| Acquired heart disease                                   | 0                   |            |                     |              |                     |                                     |             |         |
| Other chronic disorders                                  |                     |            |                     |              |                     |                                     |             |         |
| Sickle cell anemia                                       | 0                   |            | –                   |              | .12 <sup>b</sup>    |                                     |             |         |
| Down syndrome                                            | 0                   |            | –                   |              | .35 <sup>b</sup>    |                                     |             |         |
| Other genetic syndrome                                   | 0                   |            | –                   |              | .57 <sup>b</sup>    |                                     |             |         |
| Migraine                                                 | 1                   | (4.0)      | 1.71                | (0.15–19.7)  | .67                 |                                     |             |         |
| Prothrombotic state                                      | 0                   |            | –                   |              | 1.00 <sup>b</sup>   |                                     |             |         |
| Indwelling catheter                                      | 0                   |            | –                   |              | 1.00 <sup>b</sup>   |                                     |             |         |
| Iron deficiency anemia                                   | 0                   |            | –                   |              | .57 <sup>b</sup>    |                                     |             |         |
| Connective tissue disease                                | 0                   |            | –                   |              | 1.00 <sup>b</sup>   |                                     |             |         |
| Ventriculoperitoneal shunt                               | 0                   |            | –                   |              | 1.00 <sup>b</sup>   |                                     |             |         |
| Acute systemic illness                                   |                     |            |                     |              |                     |                                     |             |         |
| Infection reported in prior week                         | 3                   | (12.0)     | 0.90                | (0.23–3.54)  | .89                 |                                     |             |         |
| Systemic sepsis or bacteremia                            | 0                   |            | –                   |              | .33 <sup>b</sup>    |                                     |             |         |
| Meningitis                                               | 0                   |            | –                   |              | .07 <sup>b</sup>    |                                     |             |         |
| Dehydration                                              | 0                   |            | –                   |              | .59 <sup>b</sup>    |                                     |             |         |
| Head trauma                                              | 0                   |            | –                   |              | .07 <sup>b</sup>    |                                     |             |         |
| <b>Infarct characteristics at baseline</b>               |                     |            |                     |              |                     |                                     |             |         |
| Location                                                 |                     |            |                     |              |                     |                                     |             |         |
| Vascular distribution of infarction                      |                     |            |                     |              |                     |                                     |             |         |
| Anterior circulation                                     | 25                  | (100.0)    | –                   |              | .006 <sup>b</sup>   |                                     |             |         |
| ACA                                                      | 0                   |            | –                   |              | .02 <sup>b</sup>    |                                     |             |         |
| Lenticulostriate artery                                  | 19                  | (76.0)     | 6.01                | (2.16–16.7)  | .001 <sup>a</sup>   | 45.6                                | (4.81–433)  | .001    |
| Superficial MCA                                          | 14                  | (56.0)     | 0.54                | (0.22–1.35)  | .19                 |                                     |             |         |
| Anterior choroidal artery                                | 4                   | (16.0)     | 7.81                | (1.34–45.6)  | .02                 |                                     |             |         |
| Posterior circulation                                    | 0                   |            | –                   |              | .04 <sup>b</sup>    |                                     |             |         |
| Basilar                                                  | 0                   |            | –                   |              | 1.00 <sup>b</sup>   |                                     |             |         |
| SCA                                                      | 0                   |            | –                   |              | .19 <sup>b</sup>    |                                     |             |         |
| AICA                                                     | 0                   |            | –                   |              | 1.00 <sup>b</sup>   |                                     |             |         |
| PICA                                                     | 0                   |            | –                   |              | .07 <sup>b</sup>    |                                     |             |         |
| PCA                                                      | 0                   |            | –                   |              | .04 <sup>b</sup>    |                                     |             |         |
| Other location                                           | 0                   |            | –                   |              | .59 <sup>b</sup>    |                                     |             |         |
| Infarct side                                             |                     |            |                     |              | .001 <sup>b</sup>   |                                     |             |         |
| Unilateral                                               | 25                  | (100.0)    |                     |              |                     |                                     |             |         |
| Bilateral                                                | 0                   |            |                     |              |                     |                                     |             |         |
| Largest infarct volume (median) (IQR) (cm <sup>3</sup> ) | 13.8                | (3.3–20.1) |                     |              |                     |                                     |             |         |
| Volume <25 cm <sup>3</sup>                               | 20                  | (80.0)     | 6.84                | (2.33–20.0)  | <.0001 <sup>a</sup> | 5.48                                | (1.31–23.0) | .02     |

Continued on next page

**On-line Table 7: Continued**

| Characteristic                                 | Prevalence (n = 25) |         | Univariate Analyses |             |                     | Multivariable Analysis <sup>a</sup> |            |         |
|------------------------------------------------|---------------------|---------|---------------------|-------------|---------------------|-------------------------------------|------------|---------|
|                                                | No.                 | %       | OR                  | 95% CI      | P Value             | OR                                  | 95% CI     | P Value |
| Vascular imaging findings                      |                     |         |                     |             |                     |                                     |            |         |
| Pathologic finding                             |                     |         |                     |             |                     |                                     |            |         |
| Occlusion                                      | 10                  | (40.0)  | 0.32                | (0.13–0.79) | .01                 |                                     |            |         |
| Stenosis                                       | 15                  | (60.0)  | 0.64                | (0.25–1.61) | .34                 |                                     |            |         |
| Irregularity                                   | 15                  | (60.0)  | 1.5                 | (0.61–3.72) | .38                 |                                     |            |         |
| Ectasia or fusiform aneurysm or pseudoaneurysm | 0                   |         | –                   |             | .19 <sup>b</sup>    |                                     |            |         |
| Banding                                        | 6                   | (24.0)  | 26.2                | (2.98–230)  | .003 <sup>a</sup>   | 193                                 | (1.72–22K) | .03     |
| Intimal flap or mural hematoma                 | 0                   |         | –                   |             | 1.00 <sup>b</sup>   |                                     |            |         |
| Pathologically affected vessels                |                     |         |                     |             |                     |                                     |            |         |
| Arterial segments affected                     |                     |         |                     |             |                     |                                     |            |         |
| >1                                             | 18                  | (72.0)  | Reference           |             |                     |                                     |            |         |
| 1                                              | 7                   | (28.0)  | 3.69                | (1.19–11.5) | .02 <sup>a</sup>    | 18.9                                | (1.49–240) | .02     |
| Vascular territories affected                  |                     |         |                     |             |                     |                                     |            |         |
| >1                                             | 0                   |         |                     |             | <.0001 <sup>b</sup> |                                     |            |         |
| 1                                              | 25                  | (100.0) | –                   |             |                     |                                     |            |         |
| Side affected                                  |                     |         |                     |             |                     |                                     |            |         |
| Bilateral                                      | 0                   |         | –                   |             | <.0001 <sup>b</sup> |                                     |            |         |
| Unilateral                                     | 25                  | (100.0) | –                   |             |                     |                                     |            |         |
| Segment affected                               |                     |         |                     |             |                     |                                     |            |         |
| Supraclinoid ICA                               | 10                  | (40.0)  | 0.3                 | (0.12–0.75) | .01                 |                                     |            |         |
| Proximal MCA (M1)                              | 24                  | (96.0)  | 8.52                | (1.09–66.7) | .04 <sup>a</sup>    | 24.2                                | (1.45–405) | .03     |
| Vertebrobasilar                                | 0                   |         | –                   |             |                     |                                     |            |         |
| Cervical arteries                              | 1                   | (4.0)   | 0.09                | (0.01–0.72) | .02                 |                                     |            |         |

**Note:**—K indicates thousands; –, cannot be calculated; ACA, anterior cerebral artery; SCA, superior cerebellar artery; PCA, posterior cerebral artery; CHD, congenital heart disease; AHD, acquired heart disease; IQR, interquartile range.

<sup>a</sup> Remains significant ( $P < .05$ ) in the multivariable model after stepwise regression ( $P < .05$ ).

<sup>b</sup>  $P$  value was calculated with the Fisher exact test.

**On-line Table 8: Demographics and clinical characteristics of patients with FCA-d and FCA-i**

|                                                               | FCA-i (TCA)             |            | FCA-d (Dissection)      |            | Logistic Regression |             |                   |
|---------------------------------------------------------------|-------------------------|------------|-------------------------|------------|---------------------|-------------|-------------------|
|                                                               | No.                     | %          | No.                     | %          | OR                  | 95% CI      | P Value           |
| <b>Demographics</b>                                           |                         |            |                         |            |                     |             |                   |
| Age (median) (IQR) (yr)                                       | 11.3                    | (6.9–15.9) | 14.5                    | (6.9–15.9) | 1.06                | (0.87–1.29) | .55               |
| <b>Age by category</b>                                        |                         |            |                         |            |                     |             |                   |
| 0–3 yr                                                        | 2                       | (8.0)      | 1                       | (14.3)     | Reference           |             |                   |
| 4–7 yr                                                        | 7                       | (28.0)     | 1                       | (14.3)     | 0.29                | (0.01–6.91) | .44               |
| 8–11 yr                                                       | 6                       | (24.0)     | 1                       | (14.3)     | 0.33                | (0.01–8.18) | .50               |
| 12–15 yr                                                      | 8                       | (32.0)     | 3                       | (42.9)     | 0.75                | (0.05–11.6) | .84               |
| 16–18 yr                                                      | 2                       | (8.0)      | 1                       | (14.3)     | 1.00                | (0.03–29.8) | 1.00              |
| Male sex                                                      | 12                      | (48.0)     | 3                       | (42.9)     | 0.81                | (0.15–4.40) | .81               |
| <b>Race</b>                                                   |                         |            |                         |            |                     |             |                   |
| White                                                         | 16                      | (64.0)     | 6                       | (85.7)     | 3.38 <sup>a</sup>   | (0.35–32.6) | .29               |
| Black                                                         | 2                       | (8.0)      | 0                       | (0.0)      |                     |             |                   |
| Indian/South Asian                                            | 2                       | (8.0)      | 0                       | (0.0)      |                     |             |                   |
| East Asian                                                    | 1                       | (4.0)      | 0                       | (0.0)      |                     |             |                   |
| First Nations/Aboriginal                                      | 1                       | (4.0)      | 0                       | (0.0)      |                     |             |                   |
| Mixed or other                                                | 2                       | (8.0)      | 1                       | (14.3)     |                     |             |                   |
| Unknown                                                       | 1                       | (4.0)      | 0                       | (0.0)      |                     |             |                   |
| <b>Ethnicity</b>                                              |                         |            |                         |            |                     |             |                   |
| Hispanic                                                      | 1                       | (4.0)      | 0                       | (0.0)      |                     |             | .54 <sup>b</sup>  |
| Non-Hispanic                                                  | 23                      | (92.0)     | 6                       | (85.7)     |                     |             |                   |
| Mixed or other                                                | 1                       | (4.0)      | 1                       | (14.3)     |                     |             |                   |
| <b>Country</b>                                                |                         |            |                         |            |                     |             |                   |
| United States                                                 | 13                      | (52.0)     | 5                       | (71.4)     | 2.31 <sup>c</sup>   | (0.37–14.2) | .37               |
| Canada                                                        | 7                       | (28.0)     | 1                       | (14.3)     |                     |             |                   |
| Australia                                                     | 5                       | (20.0)     | 1                       | (14.3)     |                     |             |                   |
| <b>Stroke presentation</b>                                    |                         |            |                         |            |                     |             |                   |
| <b>Focal signs</b>                                            |                         |            |                         |            |                     |             |                   |
| Hemiparesis                                                   | 24                      | (96.0)     | 7                       | (100.0)    |                     |             | 1.00 <sup>b</sup> |
| Dysarthria                                                    | 13                      | (52.0)     | 2                       | (28.6)     | 0.34                | (0.05–2.31) | .27               |
| Aphasia                                                       | 8                       | (32.0)     | 2                       | (28.6)     | 0.25                | (0.03–2.32) | .22               |
| Ataxia                                                        | 7                       | (28.0)     | 3                       | (42.9)     | 2.14                | (0.34–13.4) | .42               |
| Visual field deficit                                          | 2                       | (8.0)      | 1                       | (14.3)     | 1.67                | (0.13–21.7) | .70               |
| <b>Nonfocal signs</b>                                         |                         |            |                         |            |                     |             |                   |
| Headache                                                      | 16                      | (64.0)     | 5                       | (71.4)     | 1.41                | (0.23–8.78) | .72               |
| Decreased level of consciousness                              | 4                       | (16.0)     | 2                       | (28.6)     | 1.90                | (0.27–13.5) | .52               |
| Nausea/vomiting                                               | 3                       | (12.0)     | 1                       | (14.3)     | 1.47                | (0.12–17.2) | .76               |
| Seizures at presentation                                      | 4                       | (16.0)     | 1                       | (14.3)     | 0.88                | (0.08–9.38) | .91               |
| Vertigo                                                       | 2                       | (8.0)      | 0                       | (0.0)      |                     |             | 1.00 <sup>b</sup> |
| Diplopia                                                      | NA: none in FCA-i group |            | NA: none in FCA-d group |            | NA                  |             |                   |
| Papilledema                                                   | NA: none in FCA-i group |            | NA: none in FCA-d group |            | NA                  |             |                   |
| <b>Risk factors or comorbidities (not mutually exclusive)</b> |                         |            |                         |            |                     |             |                   |
| <b>Cardiac disease</b>                                        |                         |            |                         |            |                     |             |                   |
| Congenital heart disease                                      | NA: none in FCA-i group |            | NA: none in FCA-d group |            | NA                  |             |                   |
| Acquired heart disease                                        | NA: none in FCA-i group |            | NA: none in FCA-d group |            | NA                  |             |                   |
| Isolated patent foramen ovale                                 | 3                       | (12.0)     | 0                       | (0.0)      |                     |             | 1.00 <sup>b</sup> |
| <b>Other chronic disorders</b>                                |                         |            |                         |            |                     |             |                   |
| Sickle cell anemia                                            | NA: none in FCA-i group |            | NA: none in FCA-d group |            | NA                  |             |                   |
| Down syndrome                                                 | NA: none in FCA-i group |            | NA: none in FCA-d group |            | NA                  |             |                   |
| Other genetic syndrome                                        | NA: none in FCA-i group |            | NA: none in FCA-d group |            | NA                  |             |                   |
| Migraine                                                      | 1                       | (4.0)      | 0                       | (0.0)      |                     |             | 1.00 <sup>b</sup> |
| Prothrombotic state                                           | NA: none in FCA-i group |            | NA: none in FCA-d group |            | NA                  |             |                   |
| Oral contraceptives (females only)                            | NA: none in FCA-i group |            | NA: none in FCA-d group |            | NA                  |             |                   |
| Indwelling catheter                                           | NA: none in FCA-i group |            | NA: none in FCA-d group |            | NA                  |             |                   |
| Iron deficiency anemia                                        | NA: none in FCA-i group |            | NA: none in FCA-d group |            | NA                  |             |                   |
| Aneurysm                                                      | NA: none in FCA-i group |            | NA: none in FCA-d group |            | NA                  |             |                   |
| Connective tissue disease                                     | NA: none in FCA-i group |            | NA: none in FCA-d group |            | NA                  |             |                   |
| Ventriculoperitoneal shunt                                    | NA: none in FCA-i group |            | NA: none in FCA-d group |            | NA                  |             |                   |
| <b>Acute systemic illness</b>                                 |                         |            |                         |            |                     |             |                   |
| Fever lasting >48 hr                                          | 1                       | (4.0)      | 0                       | (0.0)      |                     |             | 1.00 <sup>b</sup> |
| Systemic sepsis or bacteremia                                 | NA: none in FCA-i group |            | NA: none in FCA-d group |            | NA                  |             |                   |
| Meningitis                                                    | NA: none in FCA-i group |            | NA: none in FCA-d group |            | NA                  |             |                   |

Continued on next page

**On-line Table 8: Continued**

|                                   | FCA-i (TCA)             |       | FCA-d (Dissection)      |        | Logistic Regression |        |         |
|-----------------------------------|-------------------------|-------|-------------------------|--------|---------------------|--------|---------|
|                                   | No.                     | %     | No.                     | %      | OR                  | 95% CI | P Value |
| Major infection (either of above) | NA: none in FCA-i group |       | NA: none in FCA-d group |        | NA                  |        |         |
| Dehydration                       | NA: none in FCA-i group |       | NA: none in FCA-d group |        | NA                  |        |         |
| Shock                             | NA: none in FCA-i group |       | NA: none in FCA-d group |        | NA                  |        |         |
| Viral gastroenteritis             | NA: none in FCA-i group |       | NA: none in FCA-d group |        | NA                  |        |         |
| Head trauma                       | 0                       | (0.0) | 5                       | (71.4) | <.0001 <sup>b</sup> |        |         |

**Note:**—NA indicates not applicable.

<sup>a</sup> Testing white vs other.

<sup>b</sup> Fisher exact test.

<sup>c</sup> Testing United States vs other.

**On-line Table 9: Imaging characteristics of patients with FCA-d and FCA-i**

|                                                | FCA-i (TCA) |   | FCA-d (Dissection) |   | Logistic Regression |        |         |
|------------------------------------------------|-------------|---|--------------------|---|---------------------|--------|---------|
|                                                | No.         | % | No.                | % | OR                  | 95% CI | P Value |
| Infarct characteristics at baseline            |             |   |                    |   |                     |        |         |
| Location                                       |             |   |                    |   |                     |        |         |
| Vascular distribution of infarction            |             |   |                    |   |                     |        |         |
| Anterior circulation                           |             |   |                    |   |                     |        |         |
| All FAC-i group anterior                       |             |   |                    |   |                     |        |         |
| All FAC-d group anterior                       |             |   |                    |   |                     |        |         |
| NA                                             |             |   |                    |   |                     |        |         |
| ACA                                            |             |   |                    |   |                     |        |         |
| NA: none in FAC-i group                        |             |   |                    |   |                     |        |         |
| NA: none in FAC-d group                        |             |   |                    |   |                     |        |         |
| NA                                             |             |   |                    |   |                     |        |         |
| Lenticulostriate artery                        |             |   |                    |   |                     |        |         |
| 19 (76.0)                                      |             |   |                    |   |                     |        |         |
| 5 (71.4)                                       |             |   |                    |   |                     |        |         |
| 0.81 (0.12–5.17)                               |             |   |                    |   |                     |        |         |
| .81                                            |             |   |                    |   |                     |        |         |
| Superficial MCA                                |             |   |                    |   |                     |        |         |
| 14 (56.0)                                      |             |   |                    |   |                     |        |         |
| 6 (85.7)                                       |             |   |                    |   |                     |        |         |
| 4.71 (0.49–45.2)                               |             |   |                    |   |                     |        |         |
| .18                                            |             |   |                    |   |                     |        |         |
| Anterior choroidal artery                      |             |   |                    |   |                     |        |         |
| 4 (16.0)                                       |             |   |                    |   |                     |        |         |
| 1 (14.3)                                       |             |   |                    |   |                     |        |         |
| 0.88 (0.08–9.38)                               |             |   |                    |   |                     |        |         |
| .91                                            |             |   |                    |   |                     |        |         |
| Posterior circulation                          |             |   |                    |   |                     |        |         |
| NA: none in FAC-i group                        |             |   |                    |   |                     |        |         |
| NA: none in FAC-d group                        |             |   |                    |   |                     |        |         |
| NA                                             |             |   |                    |   |                     |        |         |
| Basilar artery                                 |             |   |                    |   |                     |        |         |
| NA: none in FAC-i group                        |             |   |                    |   |                     |        |         |
| NA: none in FAC-d group                        |             |   |                    |   |                     |        |         |
| NA                                             |             |   |                    |   |                     |        |         |
| SCA                                            |             |   |                    |   |                     |        |         |
| NA: none in FAC-i group                        |             |   |                    |   |                     |        |         |
| NA: none in FAC-d group                        |             |   |                    |   |                     |        |         |
| NA                                             |             |   |                    |   |                     |        |         |
| AICA                                           |             |   |                    |   |                     |        |         |
| NA: none in FAC-i group                        |             |   |                    |   |                     |        |         |
| NA: none in FAC-d group                        |             |   |                    |   |                     |        |         |
| NA                                             |             |   |                    |   |                     |        |         |
| PICA                                           |             |   |                    |   |                     |        |         |
| NA: none in FAC-i group                        |             |   |                    |   |                     |        |         |
| NA: none in FAC-d group                        |             |   |                    |   |                     |        |         |
| NA                                             |             |   |                    |   |                     |        |         |
| PCA                                            |             |   |                    |   |                     |        |         |
| NA: none in FAC-i group                        |             |   |                    |   |                     |        |         |
| NA: none in FAC-d group                        |             |   |                    |   |                     |        |         |
| NA                                             |             |   |                    |   |                     |        |         |
| Other                                          |             |   |                    |   |                     |        |         |
| NA: none in FAC-i group                        |             |   |                    |   |                     |        |         |
| NA: none in FAC-d group                        |             |   |                    |   |                     |        |         |
| NA                                             |             |   |                    |   |                     |        |         |
| Infarct side                                   |             |   |                    |   |                     |        |         |
| Left side                                      |             |   |                    |   |                     |        |         |
| 14 (56.0)                                      |             |   |                    |   |                     |        |         |
| 2 (28.6)                                       |             |   |                    |   |                     |        |         |
| Reference                                      |             |   |                    |   |                     |        |         |
| Right side                                     |             |   |                    |   |                     |        |         |
| 11 (44.0)                                      |             |   |                    |   |                     |        |         |
| 5 (71.4)                                       |             |   |                    |   |                     |        |         |
| 3.18 (0.52–19.6)                               |             |   |                    |   |                     |        |         |
| .21                                            |             |   |                    |   |                     |        |         |
| Bilateral                                      |             |   |                    |   |                     |        |         |
| NA: none in FAC-i group                        |             |   |                    |   |                     |        |         |
| NA: none in FAC-d group                        |             |   |                    |   |                     |        |         |
| NA                                             |             |   |                    |   |                     |        |         |
| Volume of largest infarct (cm <sup>3</sup> )   |             |   |                    |   |                     |        |         |
| 13.8 (3.3–20.1)                                |             |   |                    |   |                     |        |         |
| 87.6 (8.6–97.9)                                |             |   |                    |   |                     |        |         |
| 1.02 (0.999–1.03)                              |             |   |                    |   |                     |        |         |
| .05                                            |             |   |                    |   |                     |        |         |
| Hemorrhagic transformation                     |             |   |                    |   |                     |        |         |
| 3 (12.0)                                       |             |   |                    |   |                     |        |         |
| 2 (28.6)                                       |             |   |                    |   |                     |        |         |
| 3.5 (0.44–28.1)                                |             |   |                    |   |                     |        |         |
| .24                                            |             |   |                    |   |                     |        |         |
| Vascular imaging findings                      |             |   |                    |   |                     |        |         |
| Pathologic finding                             |             |   |                    |   |                     |        |         |
| Occlusion                                      |             |   |                    |   |                     |        |         |
| 10 (40.0)                                      |             |   |                    |   |                     |        |         |
| 6 (85.7)                                       |             |   |                    |   |                     |        |         |
| 9.00 (0.94–86.5)                               |             |   |                    |   |                     |        |         |
| .06                                            |             |   |                    |   |                     |        |         |
| Stenosis                                       |             |   |                    |   |                     |        |         |
| 15 (60.0)                                      |             |   |                    |   |                     |        |         |
| 6 (85.7)                                       |             |   |                    |   |                     |        |         |
| 4.00 (0.42–38.5)                               |             |   |                    |   |                     |        |         |
| .23                                            |             |   |                    |   |                     |        |         |
| Irregularity                                   |             |   |                    |   |                     |        |         |
| 15 (60.0)                                      |             |   |                    |   |                     |        |         |
| 4 (57.1)                                       |             |   |                    |   |                     |        |         |
| 0.89 (0.16–4.85)                               |             |   |                    |   |                     |        |         |
| .89                                            |             |   |                    |   |                     |        |         |
| Ectasia or fusiform aneurysm or pseudoaneurysm |             |   |                    |   |                     |        |         |
| NA: none in FAC-i group                        |             |   |                    |   |                     |        |         |
| NA: none in FAC-d group                        |             |   |                    |   |                     |        |         |
| NA                                             |             |   |                    |   |                     |        |         |
| Banding                                        |             |   |                    |   |                     |        |         |
| 6 (24.0)                                       |             |   |                    |   |                     |        |         |
| 0 (0.0)                                        |             |   |                    |   |                     |        |         |
| Intimal flap or mural hematoma                 |             |   |                    |   |                     |        |         |
| NA: none in FAC-i group                        |             |   |                    |   |                     |        |         |
| NA: none in FAC-d group                        |             |   |                    |   |                     |        |         |
| NA                                             |             |   |                    |   |                     |        |         |
| Pathologically affected vessels                |             |   |                    |   |                     |        |         |
| Arterial segments affected                     |             |   |                    |   |                     |        |         |
| ≤1                                             |             |   |                    |   |                     |        |         |
| 7 (28.0)                                       |             |   |                    |   |                     |        |         |
| 0 (0.0)                                        |             |   |                    |   |                     |        |         |
| .30 <sup>a</sup>                               |             |   |                    |   |                     |        |         |
| >1                                             |             |   |                    |   |                     |        |         |
| 18 (72.0)                                      |             |   |                    |   |                     |        |         |
| 7 (100.0)                                      |             |   |                    |   |                     |        |         |
| Vascular territories affected                  |             |   |                    |   |                     |        |         |
| 1                                              |             |   |                    |   |                     |        |         |
| 25 (100.0)                                     |             |   |                    |   |                     |        |         |
| 7 (100.0)                                      |             |   |                    |   |                     |        |         |
| NA                                             |             |   |                    |   |                     |        |         |
| >1                                             |             |   |                    |   |                     |        |         |
| NA: none in FAC-i group                        |             |   |                    |   |                     |        |         |
| NA: none in FAC-d group                        |             |   |                    |   |                     |        |         |
| NA                                             |             |   |                    |   |                     |        |         |
| Side affected                                  |             |   |                    |   |                     |        |         |
| Unilateral                                     |             |   |                    |   |                     |        |         |
| 25 (100.0)                                     |             |   |                    |   |                     |        |         |
| 7 (100.0)                                      |             |   |                    |   |                     |        |         |
| NA                                             |             |   |                    |   |                     |        |         |
| Bilateral                                      |             |   |                    |   |                     |        |         |
| NA: none in FAC-i group                        |             |   |                    |   |                     |        |         |
| NA: none in FAC-d group                        |             |   |                    |   |                     |        |         |
| NA                                             |             |   |                    |   |                     |        |         |
| Segment affected                               |             |   |                    |   |                     |        |         |
| Supraclinoid ICA                               |             |   |                    |   |                     |        |         |
| 10 (40.0)                                      |             |   |                    |   |                     |        |         |
| 7 (100.0)                                      |             |   |                    |   |                     |        |         |
| .008 <sup>a</sup>                              |             |   |                    |   |                     |        |         |
| Proximal MCA (M1)                              |             |   |                    |   |                     |        |         |
| 24 (96.0)                                      |             |   |                    |   |                     |        |         |
| 7 (100.0)                                      |             |   |                    |   |                     |        |         |
| 1.00 <sup>a</sup>                              |             |   |                    |   |                     |        |         |
| Vertebrobasilar                                |             |   |                    |   |                     |        |         |
| NA: none in FAC-i group                        |             |   |                    |   |                     |        |         |
| NA: none in FAC-d group                        |             |   |                    |   |                     |        |         |
| NA                                             |             |   |                    |   |                     |        |         |
| Cervical arteries                              |             |   |                    |   |                     |        |         |
| 1 (4.0)                                        |             |   |                    |   |                     |        |         |
| 4 (57.1)                                       |             |   |                    |   |                     |        |         |
| 32 (2.63–389)                                  |             |   |                    |   |                     |        |         |
| .007                                           |             |   |                    |   |                     |        |         |

**Note:**—ACA indicates anterior cerebral artery; SCA, superior cerebellar artery; PCA, posterior cerebral artery; NA, not applicable.

<sup>a</sup> Fisher exact test.

**On-line Table 10: Moyamoya—prevalence and univariate analyses of demographics and clinical and imaging characteristics for patients with Moyamoya (n = 34) versus all other definite arteriopathy subgroups (n = 75)**

| Characteristic                                                | Prevalence (n = 34) |             | Univariate Analyses |             |                     | Multivariable Analysis <sup>a</sup> |               |         |
|---------------------------------------------------------------|---------------------|-------------|---------------------|-------------|---------------------|-------------------------------------|---------------|---------|
|                                                               | No.                 | %           | OR                  | 95% CI      | P Value             | OR                                  | 95% CI        | P Value |
| <b>Demographics</b>                                           |                     |             |                     |             |                     |                                     |               |         |
| Age by category                                               |                     |             |                     |             |                     |                                     |               |         |
| 0–3 yr                                                        | 10                  | (29.4)      | Ref                 |             |                     |                                     |               |         |
| 4–7 yr                                                        | 14                  | (41.2)      | 1.22                | (0.44–3.34) | .70                 |                                     |               |         |
| 8–11 yr                                                       | 5                   | (14.7)      | 0.83                | (0.23–3.03) | .78                 |                                     |               |         |
| 12–15 yr                                                      | 3                   | (8.8)       | 0.55                | (0.12–2.41) | .42                 |                                     |               |         |
| 16–18 yr                                                      | 2                   | (5.9)       | 0.44                | (0.08–2.46) | .35                 |                                     |               |         |
| Male sex                                                      | 17                  | (50.0)      | 0.83                | (0.37–1.87) | .65                 |                                     |               |         |
| Race                                                          |                     |             |                     |             |                     |                                     |               |         |
| White                                                         | 16                  | (47.1)      | Ref                 |             |                     |                                     |               |         |
| Black                                                         | 10                  | (29.4)      | 7.65                | (2.11–27.8) | .002 <sup>a</sup>   | 43.2                                | (2.38–781)    | .01     |
| Indian/South Asian                                            | 2                   | (5.9)       | 0.51                | (0.10–2.53) | .41                 |                                     |               |         |
| East Asian                                                    | 1                   | (2.9)       | 1.53                | (0.13–18.0) | .74                 |                                     |               |         |
| Middle Eastern                                                | 0                   |             | –                   |             |                     |                                     |               |         |
| First Nations/Aboriginal                                      | 0                   |             | –                   |             |                     |                                     |               |         |
| Mixed or other                                                | 3                   | (8.8)       | 1.53                | (0.34–6.84) | .58                 |                                     |               |         |
| Unknown                                                       | 2                   | (5.9)       | 6.13                | (0.52–72.1) | .15                 |                                     |               |         |
| <b>Stroke presentation</b>                                    |                     |             |                     |             |                     |                                     |               |         |
| Focal signs                                                   |                     |             |                     |             |                     |                                     |               |         |
| Hemiparesis                                                   | 29                  | (85.3)      | 1.22                | (0.40–3.73) | .73                 |                                     |               |         |
| Dysarthria                                                    | 8                   | (23.5)      | 0.62                | (0.24–1.55) | .30                 |                                     |               |         |
| Aphasia                                                       | 11                  | (32.4)      | 1.51                | (0.62–3.70) | .36                 |                                     |               |         |
| Ataxia                                                        | 5                   | (14.7)      | 0.51                | (0.17–1.50) | .22                 |                                     |               |         |
| Visual field deficit                                          | 3                   | (8.8)       | 0.81                | (0.20–3.27) | .77                 |                                     |               |         |
| Nonfocal signs                                                |                     |             |                     |             |                     |                                     |               |         |
| Headache                                                      | 3                   | (8.8)       | 0.08                | (0.02–0.30) | <.0001              |                                     |               |         |
| Decreased level of consciousness                              | 4                   | (11.8)      | 0.27                | (0.09–0.87) | .03 <sup>a</sup>    | 0.01                                | (0.0009–0.19) | .002    |
| Nausea/vomiting                                               | 8                   | (23.5)      | 0.83                | (0.32–2.16) | .71                 |                                     |               |         |
| Seizures at presentation                                      | 12                  | (35.3)      | 2.1                 | (0.85–5.21) | .11                 |                                     |               |         |
| Vertigo                                                       | 0                   |             | –                   |             | .01 <sup>b</sup>    |                                     |               |         |
| Diplopia                                                      | 0                   |             | –                   |             | 1.00 <sup>b</sup>   |                                     |               |         |
| <b>Risk factors or comorbidities (not mutually exclusive)</b> |                     |             |                     |             |                     |                                     |               |         |
| Cardiac disease (CHD and/or AHD)                              |                     |             |                     |             |                     |                                     |               |         |
| Cardiac disease (CHD and/or AHD)                              | 3                   | (8.8)       | 2.32                | (0.44–12.2) | .32                 |                                     |               |         |
| Congenital heart disease                                      | 3                   | (8.8)       |                     |             |                     |                                     |               |         |
| Acquired heart disease                                        | 0                   |             |                     |             |                     |                                     |               |         |
| Other chronic disorders                                       |                     |             |                     |             |                     |                                     |               |         |
| Sickle cell anemia                                            | 9                   | (26.5)      | –                   |             | <.0001 <sup>b</sup> |                                     |               |         |
| Down syndrome                                                 | 6                   | (17.6)      | 15.9                | (1.83–138)  | .01 <sup>a</sup>    | 2099                                | (134–328K)    | .003    |
| Other genetic syndrome                                        | 0                   |             | –                   |             | .31 <sup>b</sup>    |                                     |               |         |
| Migraine                                                      | 0                   |             | –                   |             | .55 <sup>b</sup>    |                                     |               |         |
| Prothrombotic state                                           |                     | (2.9)       | 2.24                | (0.14–36.9) | .57                 |                                     |               |         |
| Indwelling catheter                                           | 0                   |             | –                   |             | 1.00 <sup>b</sup>   |                                     |               |         |
| Iron deficiency anemia                                        | 2                   | (5.9)       | 2.28                | (0.31–16.9) | .42                 |                                     |               |         |
| Connective tissue disease                                     | 0                   |             | –                   |             | 1.00 <sup>b</sup>   |                                     |               |         |
| Ventriculoperitoneal shunt                                    | 0                   |             | –                   |             | 1.00 <sup>b</sup>   |                                     |               |         |
| <b>Acute systemic illness</b>                                 |                     |             |                     |             |                     |                                     |               |         |
| Infection reported in prior 7 days                            |                     |             |                     |             |                     |                                     |               |         |
| Infection reported in prior 7 days                            | 8                   | (23.5)      | 3.54                | (1.12–11.2) | .03 <sup>a</sup>    | 30.0                                | (1.58–569)    | .02     |
| Systemic sepsis or bacteremia                                 | 0                   |             | –                   |             | .17 <sup>b</sup>    |                                     |               |         |
| Meningitis                                                    | 0                   |             | –                   |             | .02 <sup>b</sup>    |                                     |               |         |
| Dehydration                                                   | 4                   | (11.8)      | 9.87                | (1.06–91.9) | .04                 |                                     |               |         |
| Head trauma                                                   | 1                   | (2.9)       | 0.20                | (0.02–1.61) | .13                 |                                     |               |         |
| <b>Infarct characteristics at baseline</b>                    |                     |             |                     |             |                     |                                     |               |         |
| Location                                                      |                     |             |                     |             |                     |                                     |               |         |
| Vascular distribution of infarction                           |                     |             |                     |             |                     |                                     |               |         |
| Anterior circulation                                          |                     |             |                     |             |                     |                                     |               |         |
| Anterior circulation                                          | 31                  | (91.2)      | 3.03                | (0.82–11.1) | .10                 |                                     |               |         |
| ACA                                                           | 5                   | (14.7)      | 1.12                | (0.35–3.57) | .85                 |                                     |               |         |
| Lenticulostriate artery                                       | 8                   | (23.5)      | 0.27                | (0.11–0.67) | .005                |                                     |               |         |
| Superficial MCA                                               | 30                  | (88.2)      | 5.58                | (1.79–17.4) | .003 <sup>a</sup>   |                                     |               |         |
| Anterior choroidal artery                                     | 0                   |             | –                   |             | .17 <sup>b</sup>    |                                     |               |         |
| Posterior circulation                                         |                     |             |                     |             |                     |                                     |               |         |
| Posterior circulation                                         | 0                   |             | –                   |             | .005 <sup>b</sup>   |                                     |               |         |
| Basilar artery                                                | 0                   |             | –                   |             | .55 <sup>b</sup>    |                                     |               |         |
| SCA                                                           | 0                   |             | –                   |             | .06 <sup>b</sup>    |                                     |               |         |
| AICA                                                          | 0                   |             | –                   |             | 1.00 <sup>b</sup>   |                                     |               |         |
| PICA                                                          | 0                   |             | –                   |             | .02 <sup>b</sup>    |                                     |               |         |
| PCA                                                           | 0                   |             | –                   |             | .005 <sup>b</sup>   |                                     |               |         |
| Other location                                                | 4                   | (11.8)      | 9.87                | (1.06–91.9) | .04                 |                                     |               |         |
| Infarct side                                                  |                     |             |                     |             |                     |                                     |               |         |
| Unilateral                                                    | 24                  | (70.6)      | Ref                 |             |                     |                                     |               |         |
| Bilateral                                                     | 10                  | (29.4)      | 1.54                | (0.61–3.86) | .36                 |                                     |               |         |
| Largest infarct volume (median) (IQR) (cm <sup>3</sup> )      | 54.6                | (4.39–88.9) |                     |             |                     |                                     |               |         |
| Volume ≥25 cm <sup>3</sup>                                    | 22                  | (64.7)      | 1.99                | (0.86–4.86) | .11                 |                                     |               |         |

Continued on next page

**On-line Table 10: Continued**

| Characteristic                                 | Prevalence (n = 34) |        | Univariate Analyses |             |                     | Multivariable Analysis <sup>a</sup> |             |         |
|------------------------------------------------|---------------------|--------|---------------------|-------------|---------------------|-------------------------------------|-------------|---------|
|                                                | No.                 | %      | OR                  | 95% CI      | P Value             | OR                                  | 95% CI      | P Value |
| Vascular imaging findings                      |                     |        |                     |             |                     |                                     |             |         |
| Pathologic finding                             |                     |        |                     |             |                     |                                     |             |         |
| Occlusion                                      | 25                  | (73.5) | 2.18                | (0.90–5.30) | .09                 |                                     |             |         |
| Stenosis                                       | 26                  | (76.5) | 1.83                | (0.73–4.60) | .20                 |                                     |             |         |
| Irregularity                                   | 14                  | (41.2) | 0.52                | (0.23–1.19) | .12                 |                                     |             |         |
| Ectasia or fusiform aneurysm or pseudoaneurysm | 1                   | (2.9)  | 0.29                | (0.03–2.50) | .26                 |                                     |             |         |
| Banding                                        | 0                   |        | –                   |             | .10 <sup>b</sup>    |                                     |             |         |
| Intimal flap or mural hematoma                 | 0                   |        | –                   |             | .55 <sup>b</sup>    |                                     |             |         |
| Vascular territories affected                  |                     |        |                     |             |                     |                                     |             |         |
| >1                                             | 31                  | (91.2) | 32.7                | (8.93–120)  | <.0001 <sup>a</sup> | 325.0                               | (19.1–5522) | <.0001  |
| 1                                              | 3                   | (8.8)  | Ref                 |             |                     |                                     |             |         |
| Segment affected                               |                     |        |                     |             |                     |                                     |             |         |
| Supraclinoid ICA                               | 32                  | (94.1) | 17.3                | (3.87–77.6) | <.0001 <sup>a</sup> | 61.0                                | (2.32–1602) | .01     |
| Proximal MCA (M1)                              | 32                  | (94.1) | 6.22                | (1.37–28.3) | .02                 |                                     |             |         |
| Vertebrobasilar artery                         | 7                   | (20.6) | 0.59                | (0.22–1.54) | .28                 |                                     |             |         |
| Cervical arteries                              | 6                   | (17.6) | 0.55                | (0.20–1.52) | .25                 |                                     |             |         |

**Note:**—Ref indicates reference; –, cannot be calculated; ACA, anterior cerebral artery; SCA, superior cerebellar artery; PCA, posterior cerebral artery; CHD, congenital heart disease; AHD, acquired heart disease; IQR, interquartile range.

<sup>a</sup> Remains significant ( $P < .05$ ) in the multivariable model after stepwise regression ( $P < .05$ ).

<sup>b</sup>  $P$  value was calculated with the Fisher exact test.

**On-line Table 11: Multivariable analyses with odds ratios (95% confidence intervals) and P values for cardioembolism and arteriopathy subtypes**

| Arteriopathy Subtype                          | Cardioembolic                                      | Dissection                                         | FCA-i                                                       | Moyamoya                                           | Vasculitis                                                                                                      | Other Definite                              |
|-----------------------------------------------|----------------------------------------------------|----------------------------------------------------|-------------------------------------------------------------|----------------------------------------------------|-----------------------------------------------------------------------------------------------------------------|---------------------------------------------|
| Demographic characteristics                   |                                                    |                                                    |                                                             |                                                    |                                                                                                                 |                                             |
| Black vs other                                |                                                    |                                                    |                                                             | 17 (1.77–163) $P = .01$<br>(10 patients of 34)     |                                                                                                                 |                                             |
| Clinical characteristics                      |                                                    |                                                    |                                                             |                                                    |                                                                                                                 |                                             |
| Congenital or acquired heart disease          | 991 (99–11K) $P < .0001$<br>(63 patients of 65)    |                                                    |                                                             |                                                    |                                                                                                                 |                                             |
| Down syndrome                                 |                                                    |                                                    |                                                             | 312 (8.02–12K) $P = .002$<br>(6 patients of 34)    | 11 Patients of 15 had meningitis;<br>none in other dx groups<br>2456 (27–222K) $P < .001$<br>(5 patients of 15) |                                             |
| Meningitis                                    |                                                    |                                                    |                                                             |                                                    |                                                                                                                 |                                             |
| Sepsis/bacteremia                             |                                                    |                                                    |                                                             |                                                    |                                                                                                                 |                                             |
| Head trauma                                   |                                                    | 162 (10.7–3435) $P < .0001$<br>(10 patients of 26) |                                                             |                                                    |                                                                                                                 |                                             |
| Presentation                                  |                                                    |                                                    |                                                             |                                                    |                                                                                                                 |                                             |
| Dysarthria                                    |                                                    |                                                    | 8.03 (1.36–47.3) $P = .02$<br>(13 patients of 25)           |                                                    |                                                                                                                 |                                             |
| Nausea/vomiting                               |                                                    | 4.89 (1.03–23.3) $P = .05$<br>(3 patients of 24)   |                                                             |                                                    |                                                                                                                 |                                             |
| Vertigo                                       |                                                    | 37.7 (4.2–338) $P = .001$<br>(8 patients of 26)    |                                                             |                                                    |                                                                                                                 |                                             |
| Decreased level of consciousness              |                                                    |                                                    |                                                             |                                                    |                                                                                                                 |                                             |
| Infarct characteristics at baseline: location |                                                    |                                                    |                                                             |                                                    |                                                                                                                 |                                             |
| Lenticulostriate artery                       |                                                    |                                                    | 55.8 (5.78–539) $P = .001$<br>(19 patients of 25)           | 0.03 (0.003–0.22) $P = .001$<br>(4 patients of 34) | 42.7 (2.98–613) $P = .006$<br>(11 patients of 15)                                                               |                                             |
| Infarct characteristics at baseline: volume   |                                                    |                                                    |                                                             |                                                    |                                                                                                                 |                                             |
| Infarct volume                                |                                                    |                                                    | 0.98 (0.97–0.99) $P = .05$<br>(median, 13.8; IQR, 3.3–13.8) |                                                    |                                                                                                                 |                                             |
| Vascular imaging abnormal findings            |                                                    |                                                    |                                                             |                                                    |                                                                                                                 |                                             |
| Occlusion                                     |                                                    |                                                    |                                                             |                                                    |                                                                                                                 |                                             |
| Stenosis                                      | 0.12 (0.02–0.81) $P < .03$<br>(7 patients of 65)   |                                                    |                                                             |                                                    |                                                                                                                 |                                             |
| Irregularity                                  | 0.04 (0.004–0.42) $P = .007$<br>(6 patients of 65) |                                                    |                                                             |                                                    |                                                                                                                 |                                             |
| Banding                                       |                                                    |                                                    |                                                             |                                                    |                                                                                                                 |                                             |
| Vascular territories affected                 |                                                    |                                                    |                                                             |                                                    |                                                                                                                 |                                             |
| >1                                            |                                                    |                                                    | 293 (2.29–37K) $P = .02$<br>(6 patients of 25)              | 131 (14–1168) $P < .0001$<br>(31 patients of 34)   |                                                                                                                 |                                             |
| Arterial segments affected                    |                                                    |                                                    |                                                             |                                                    |                                                                                                                 |                                             |
| >1                                            |                                                    |                                                    | 0.05 (0.004–0.67) $P = .02$<br>(18 patients of 25)          |                                                    |                                                                                                                 |                                             |
| Affected artery                               |                                                    |                                                    |                                                             |                                                    |                                                                                                                 |                                             |
| Proximal MCA (M1)                             |                                                    |                                                    | 25.4 (1.52–424) $P = .02$<br>(24 patients of 25)            |                                                    |                                                                                                                 |                                             |
| Distal ICA (supracallosal artery)             |                                                    |                                                    |                                                             |                                                    |                                                                                                                 |                                             |
| Cervical artery                               |                                                    | 29.3 (5.43–159) $P < .0001$<br>(18 patients of 26) |                                                             | 22 (1.99–237) $P = .01$<br>(32 patients of 34)     |                                                                                                                 | 25.8 (1.22–547.4) 0.04<br>(8 patients of 9) |

**Note:**—dx indicates diagnosis; K, thousands; IQR, interquartile range.
